# Supplementary material for: Integrative Taxonomy and Species Delimitation in Harvestmen: A Revision of the Western North American Genus Sclerobunus (Opiliones: Laniatores: Travunioidea)
Source: PubMed Central journal article supplement (PMC4140732; doi:10.1371/journal.pone.0104982), 2014-08-21
Supplement: pone.0104982.s005.pdf [file pone.0104982.s005.pdf]

Recent studies have shown the potential for high throughput data in shallow level phylogenetics [1-3] and the utility of transcriptomic data in phylogenetics [e.g., 4,5] including studies in harvestmen [6]. Illumina transcriptome data were already available for *Sclerobunus nondimorphicus* and the outgroup genus *Theromaster* [6]. To supplement these data, total RNA was extracted from a population of *S. robustus* from the Huachuca Mountains, Arizona. Prior to RNA extraction, the midgut was dissected out while immersed in RNAlater to reduce potential microbial contamination. Total RNA was extracted from whole specimens (midgut removed) using TRIzol (Invitrogen, Carlsbad, CA) and the RNeasy MiniElute Cleanup Kit (Qiagen, Valencia, CA). RNA samples were sent to the HudsonAlpha Institute for Biotechnology ([www.hudsonalpha.org](http://www.hudsonalpha.org)) where normalized libraries were prepared and 50 base pair paired-end reads were sequenced using Illumina HiSeq technology. The raw read data were quality filtered using Trim Galore! ([http://www.bioinformatics.babraham.ac.uk/projects/trim\\_galore/](http://www.bioinformatics.babraham.ac.uk/projects/trim_galore/)) and Prinseq [7] and assembled using default parameters in Trinity [8] on an Intel XEON server with 100 GB of SDRAM. Raw reads have been deposited in the Sequence Read Archive [BioProject ID PRJNA254507: accessions SRS654678, SRS654733, SRS654734]. Assembled transcriptomes were searched locally against known single copy, single exon *Ixodes* proteins (<http://www.vectorbase.org>) to identify orthologous genes shared in all three harvestmen transcriptomes in Geneious Pro 6 (<http://www.geneious.com>). Via comparison of these orthologs, specifically between the two congeneric *Sclerobunus* transcriptomes, hundreds of rapidly evolving exon and UTR gene regions were identified, and PCR primers were designed targeting 8 of these gene regions for analyses (see table below).

Genomic DNA was extracted from specimens (2-3 legs) using the Qiagen Dneasy Kit (Qiagen, Valencia, CA), per manufacturer's protocol. All PCR reactions contained 0.8 µl of genomic DNA mixed into a cocktail containing 2.5 µl of each primer (10.0 µl), 2.5 µl 10X PCR buffer, 0.5 µl 10mM dNTP mixture (0.2 mM of each dNTP), 0.75 µl 50 mM Magnesium Chloride, 0.1 µl of Platinum *Taq* DNA polymerase (Invitrogen), and 15.3 µl of tissue culture water bringing the total reaction to 25 µl. All 8 nuclear gene regions were amplified using a *single* set of PCR cycle conditions: 94°C for 3 min, (94°C for 60 sec, 62°C for 75 sec, 72°C for 90 sec) repeated 10 times, followed by (94°C for 15 sec, 57°C for 75 sec, 72°C for 90 sec) repeated 30 times, then 72°C for 5 min. PCR products from successful experiments were plate purified (Millipore) and sent to Macrogen USA for direct Sanger sequencing.

1. Lemmon AR, Lemmon EM (2012) High-throughput identification of informative nuclear loci for shallow-scale phylogenetics and phylogeography. *Syst Biol* 61: 745-761.
2. McCormack JE, Hird SM, Zellmer AJ, Carstens BC, Brumfield RT (2011) Applications of next-generation sequencing to phylogeography and phylogenetics. *Mol Phylogenet Evol* 66: 526-538.
3. McCormack JE, Maley JM, Hird SM, Derryberry EP, Graves GR, Brumfield RT (2012) Next-generation sequencing reveals phylogeographic structure and a species tree for recent bird divergences. *Mol Phylogenet Evol* 62: 397-406.
4. Kocot KM, Cannon JT, Todt C, Citarella MR, Kohn AB, et al. (2011) Phylogenomics reveals deep molluscan relationships. *Nature* 477: 452-456.
5. Hartmann S, Helm C, Nickel B, Meyer M, Struck TH, et al. (2012). Exploiting gene families for phylogenomic analysis of myzostomid transcriptome data. *PLOS One* 7(1): e29843.
6. Hedin M, Starrett J, Akhter S, Schönhofer AL, Shultz, JW (2012) Phylogenomic resolution of Paleozoic divergences in harvestmen (Arachnida, Opiliones) via analysis of next-generation transcriptome data. *PLOS One* 7(8): e42888.
7. Schmieder R, Edwards R (2011) Quality control and preprocessing of metagenomic datasets. *Bioinformatics* 27: 863-864.
8. Grabherr MG, Haas BJ, Yassour M, Levin JZ, Thompson DA, et al. (2011) Full-length transcriptome assembly from RNA-Seq data without a reference genome. *Nature Biotechnol* 29: 644-652.

| <b>Locus Name</b>                                | <b>Abbreviation</b> | <b>Region</b> | <b>Primer Name</b> | <b>Direction</b> | <b>Primer Sequence</b>         | <b>ISCW<br/>vectorbase</b> |
|--------------------------------------------------|---------------------|---------------|--------------------|------------------|--------------------------------|----------------------------|
| Tetratricopeptide repeat protein                 | TPR                 | Exon          | ScleroA1           | Forward          | CAACGAGAACCAATGCACATTGAAGGC    | ISCW000183                 |
|                                                  |                     |               | ScleroA2           | Reverse          | TTGATGTCTACCAATCTATGGAATGCG    |                            |
| Conserved hypothetical protein                   | CHP1                | Exon          | ScleroA5           | Forward          | TGAATCGTCAAATGATTATTGGACCAGC   | ISCW000678                 |
|                                                  |                     |               | ScleroA6           | Reverse          | TTGTTGACTATCACGACCAGCTATYACC   |                            |
| Conserved hypothetical protein                   | CHP2                | Exon          | ScleroB5           | Forward          | CGCTGGACGAATTGGAGTCATCGGAG     | ISCW000678                 |
|                                                  |                     |               | ScleroB6           | Reverse          | CATGCTTCTCGAATGCTTGATATATGC    |                            |
| Neuromusculin                                    | nrm                 | 3' UTR        | ScleroD7           | Forward          | CGATTTGTACGATGATGTGAAGACTGGC   | ISCW006547                 |
|                                                  |                     |               | ScleroD8           | Reverse          | GCATGTTACGCGAGAAGTGATAACAGTC   |                            |
| 1,4-dihydroxyl-2-napthoate octaprenyltransferase | DNO                 | Exon          | ScleroE7           | Forward          | GCTGCCTTAGCSTACAAGTGTGCCCAAG   | ISCW005714                 |
|                                                  |                     |               | ScleroE8           | Reverse          | GTCTCGGAACCCTTTCTCCAAGTGAAG    |                            |
| Ski-interacting protein                          | SKI                 | Exon          | ScleroF10          | Forward          | AACGTCTAGCAGCCGACGGCAGAGG      | ISCW021146                 |
|                                                  |                     |               | ScleroF11          | Reverse          | TYGGACGCTTGCTCGCCTTCTTAGC      |                            |
| Double-stranded RNA-specific editase B2          | ADARB2              | Exon          | ScleroG7           | Forward          | AATCGYAAGCGCCGTAGTGGAATGGATGG  | ISCW018470                 |
|                                                  |                     |               | ScleroG8           | Reverse          | GCAATCGTTAAGGGCAGCACCATTTCATAC |                            |
| Phosphoglycerate mutase                          | PGM                 | 3' UTR        | ScleroH8           | Forward          | TCACAATGCMGCGCTGTGTGACGTGGC    | ISCW020443                 |
|                                                  |                     |               | ScleroH9           | Reverse          | ATACCTAACAAATAGRAACTAGCCTGG    |                            |
