# Supplementary material for: Integrative Taxonomy and Species Delimitation in Harvestmen: A Revision of the Western North American Genus Sclerobunus (Opiliones: Laniatores: Travunioidea)
Source: PubMed Central journal article supplement (PMC4140732; doi:10.1371/journal.pone.0104982), 2014-08-21
Supplement: pone.0104982.s006.pdf [file pone.0104982.s006.pdf]

Results of the species limits testing using the Grummer et al. [1] method. GlorCan = Glorieta Canyon. TSV surf = Taos Ski Valley surface population. TSVtrog = *S. klomax*. glorS = *S. skywalker*.

**Species Limits Testing**

|                                    | <b>-lnL</b> | <b>BF</b> |
|------------------------------------|-------------|-----------|
| GlorCan + TSVsurf; TSVtrog; glorS  | -19481.2477 | 2.3138    |
| GlorCan + glorS; TSVtrog + TSVsurf | -19480.0908 | 0         |
| GlorCan + glorS; TSVtrog; TSVsurf  | -19481.2280 | 2.2744    |
| GlorCan + TSVtrog + TSVsurf; glorS | -19481.753  | 3.3244    |

Species tree and BPP results from analyses in which all populations of the *glorietus* complex are each treated as putative species.

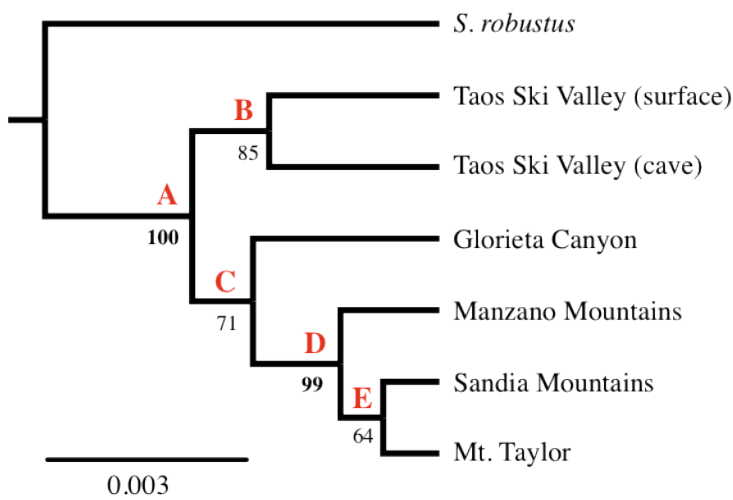

| <b>BP&amp;P</b>                                        | <b>A</b> | <b>B</b> | <b>C</b> | <b>D</b> | <b>E</b> |
|--------------------------------------------------------|----------|----------|----------|----------|----------|
| $\theta \sim \Gamma(2,10), \tau \sim \Gamma(2,10)$     | 1        | 1        | 0.99     | 0.86     | 0.32     |
| $\theta \sim \Gamma(2,10), \tau \sim \Gamma(2,1000)$   | 1        | 1        | 0.99     | 0.85     | 0.32     |
| $\theta \sim \Gamma(2,1000), \tau \sim \Gamma(2,10)$   | 1        | 1        | 1        | 1        | 0.99     |
| $\theta \sim \Gamma(2,1000), \tau \sim \Gamma(2,1000)$ | 1        | 1        | 1        | 1        | 0.99     |

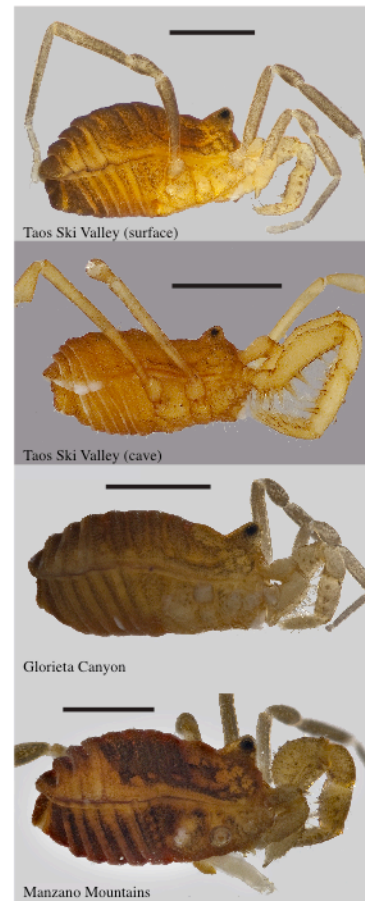

1. Grummer JA, Bryson RW, Reeder TW (2014) Species delimitation using Bayes factors: simulations and application to the *Sceloporus scalaris* species group (Squamata: Phrynosomatidae). Syst Biol 63: 119-133.
