# Supplementary material for: Integrative Taxonomy and Species Delimitation in Harvestmen: A Revision of the Western North American Genus Sclerobunus (Opiliones: Laniatores: Travunioidea)
Source: PubMed Central journal article supplement (PMC4140732; doi:10.1371/journal.pone.0104982), 2014-08-21
Supplement: pone.0104982.s009.pdf [file pone.0104982.s009.pdf]

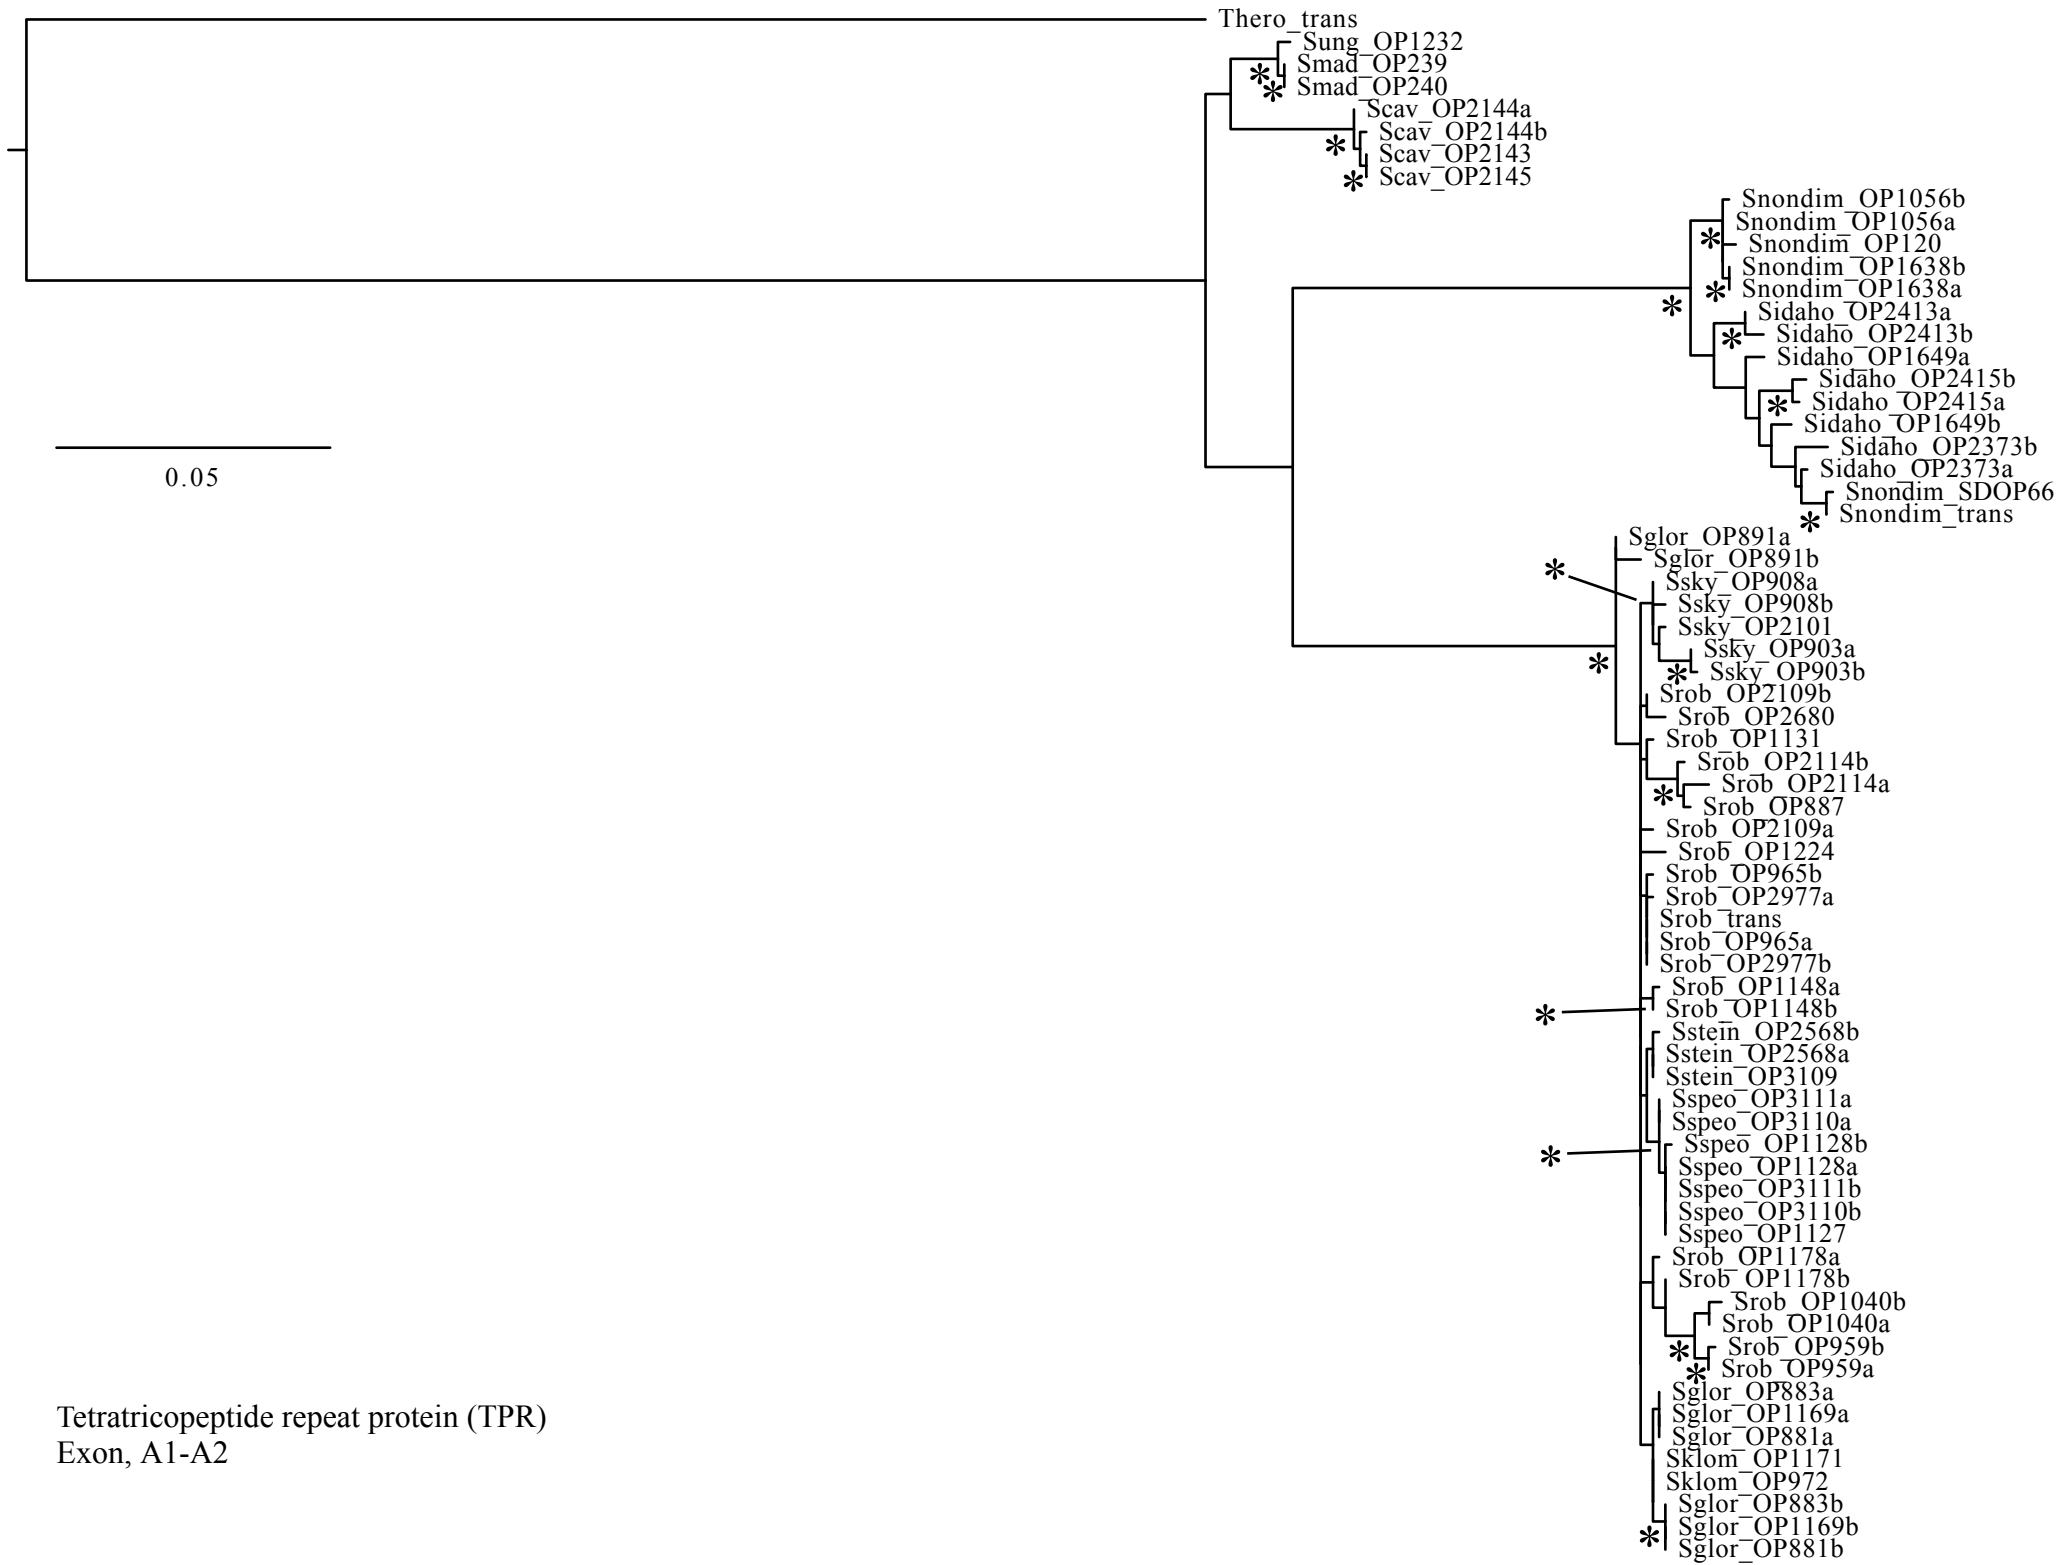

Tetratricopeptide repeat protein (TPR)  
Exon, A1-A2

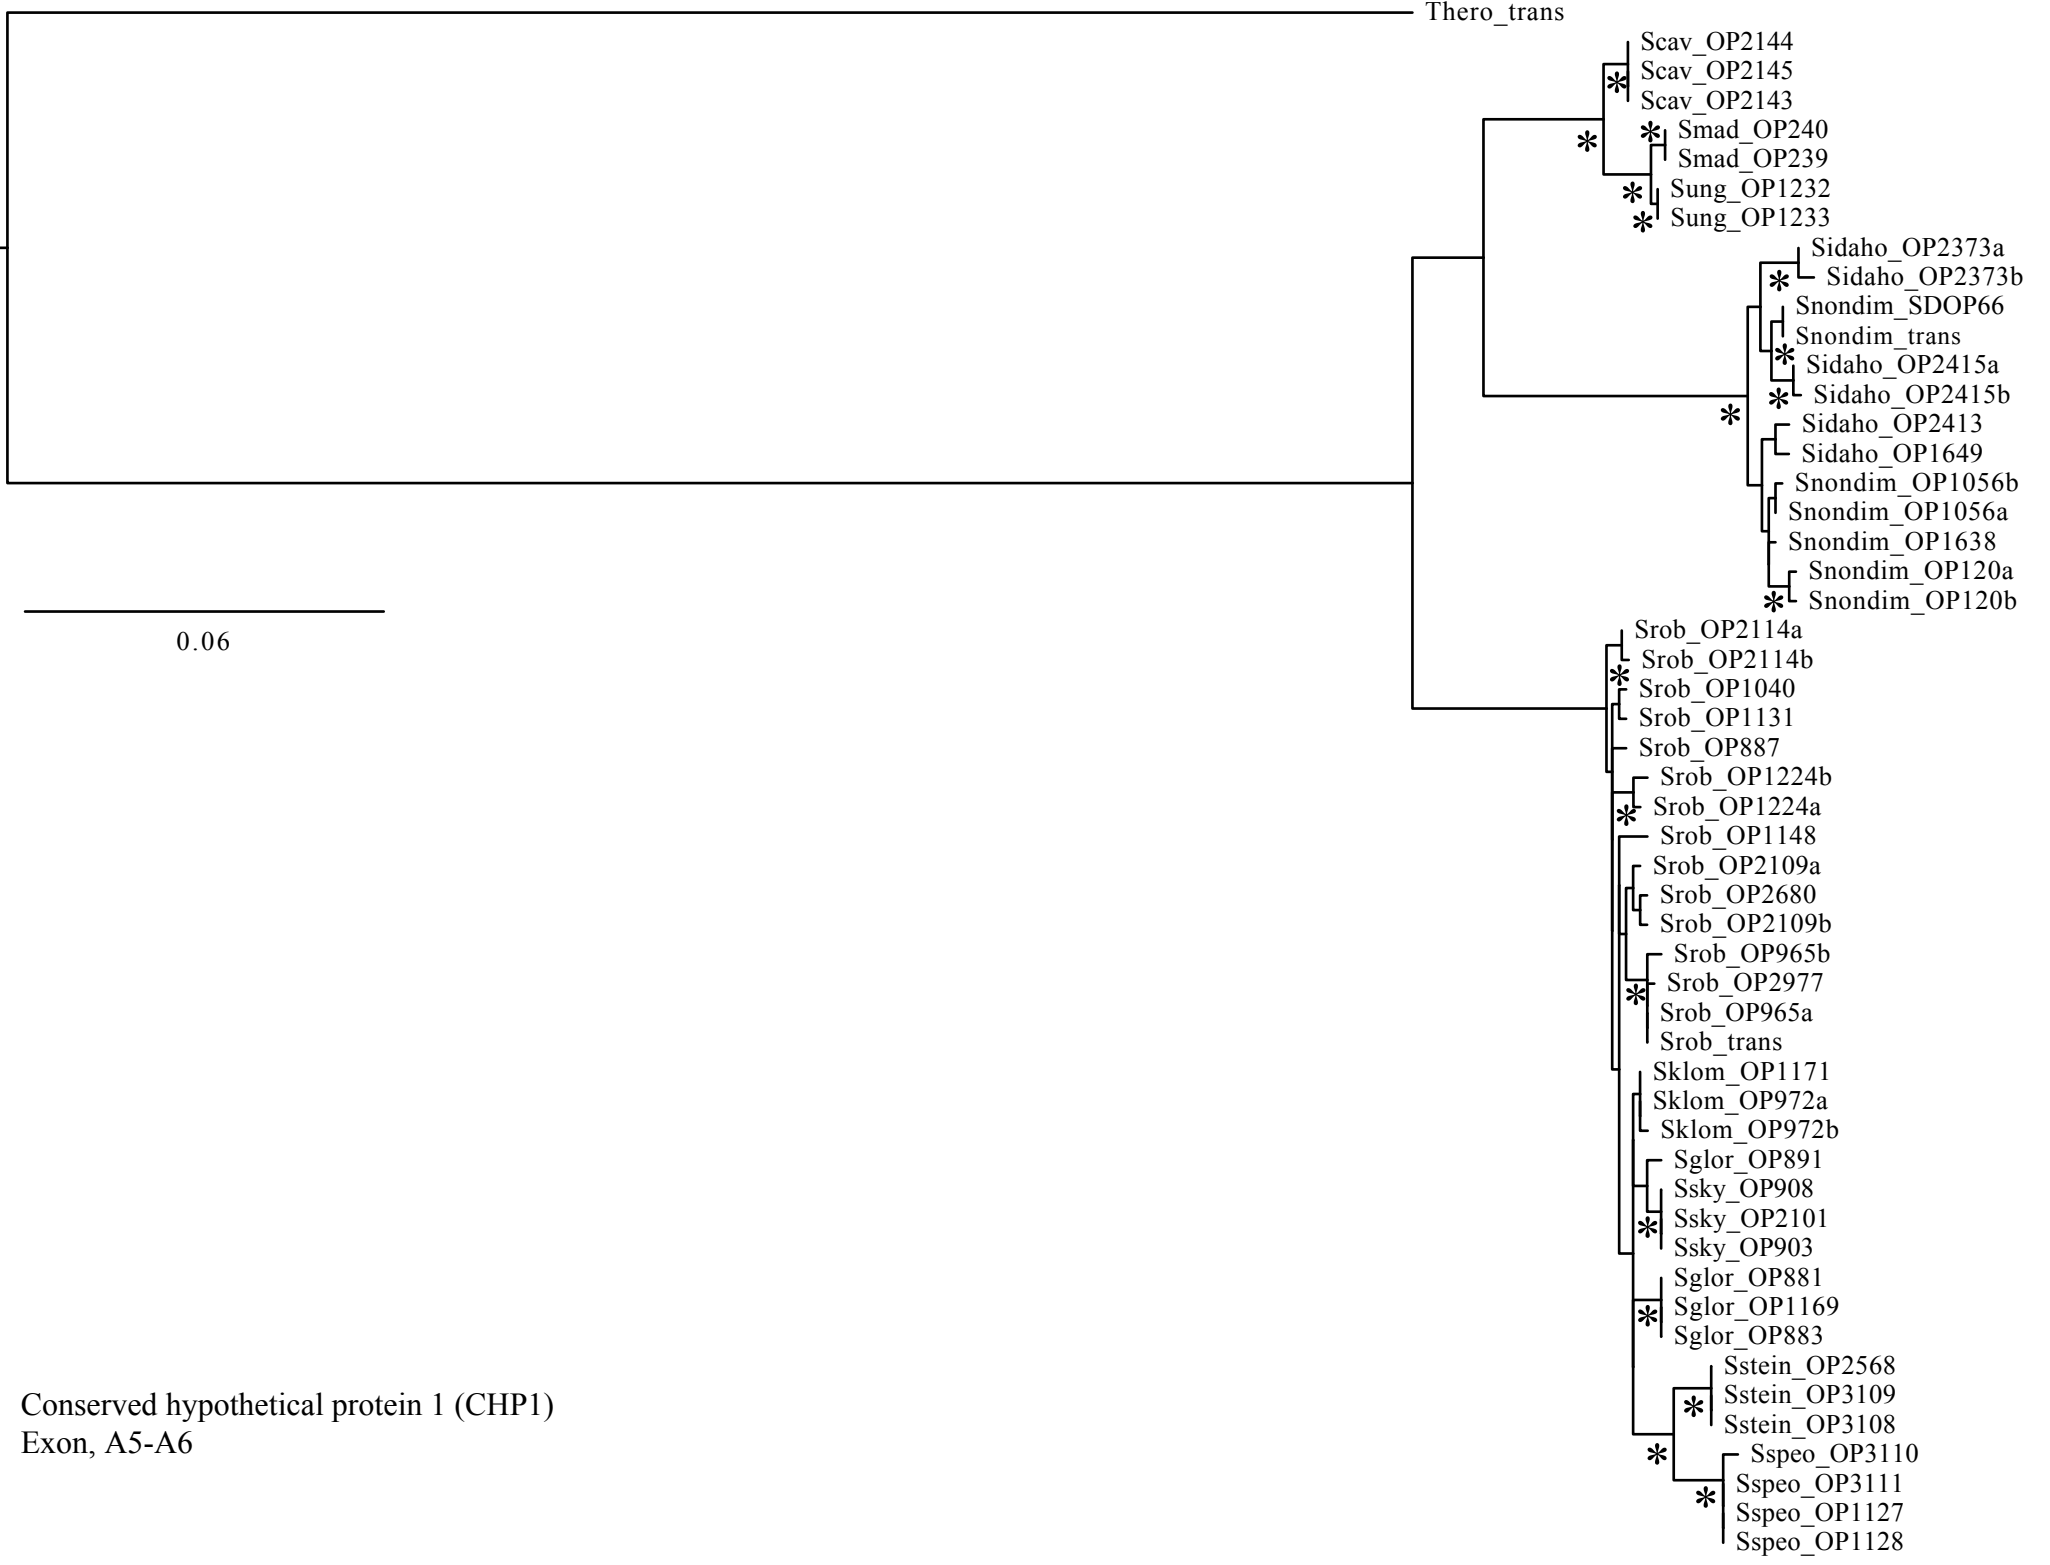

Conserved hypothetical protein 1 (CHP1)  
Exon, A5-A6

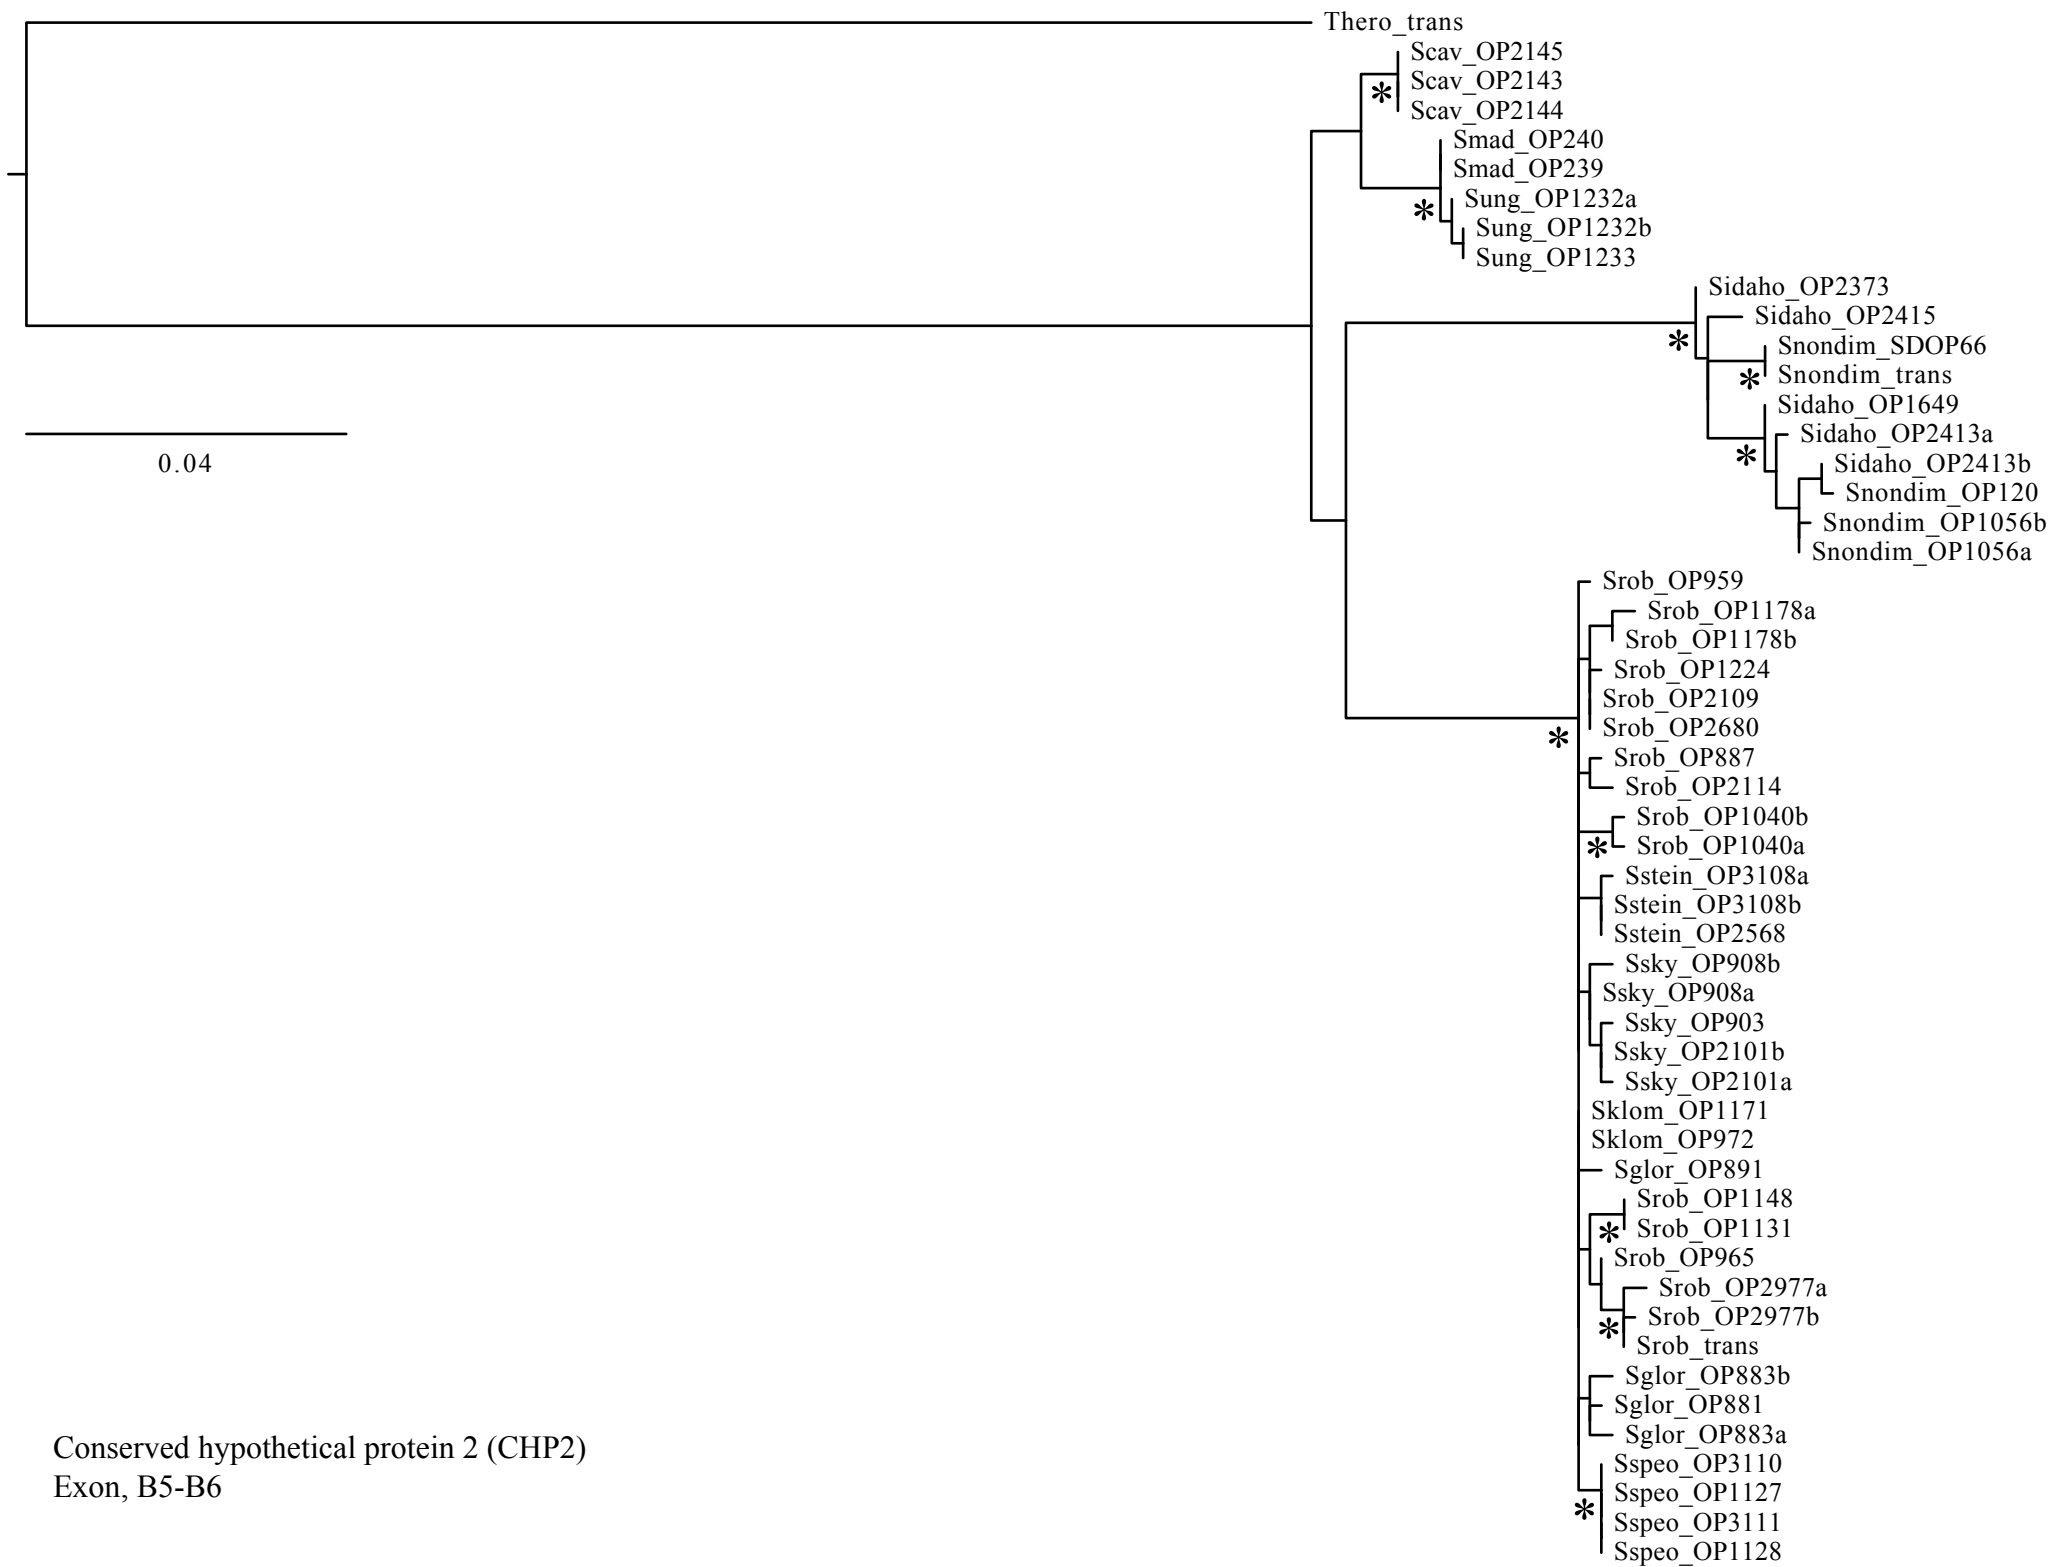

Conserved hypothetical protein 2 (CHP2)  
Exon, B5-B6



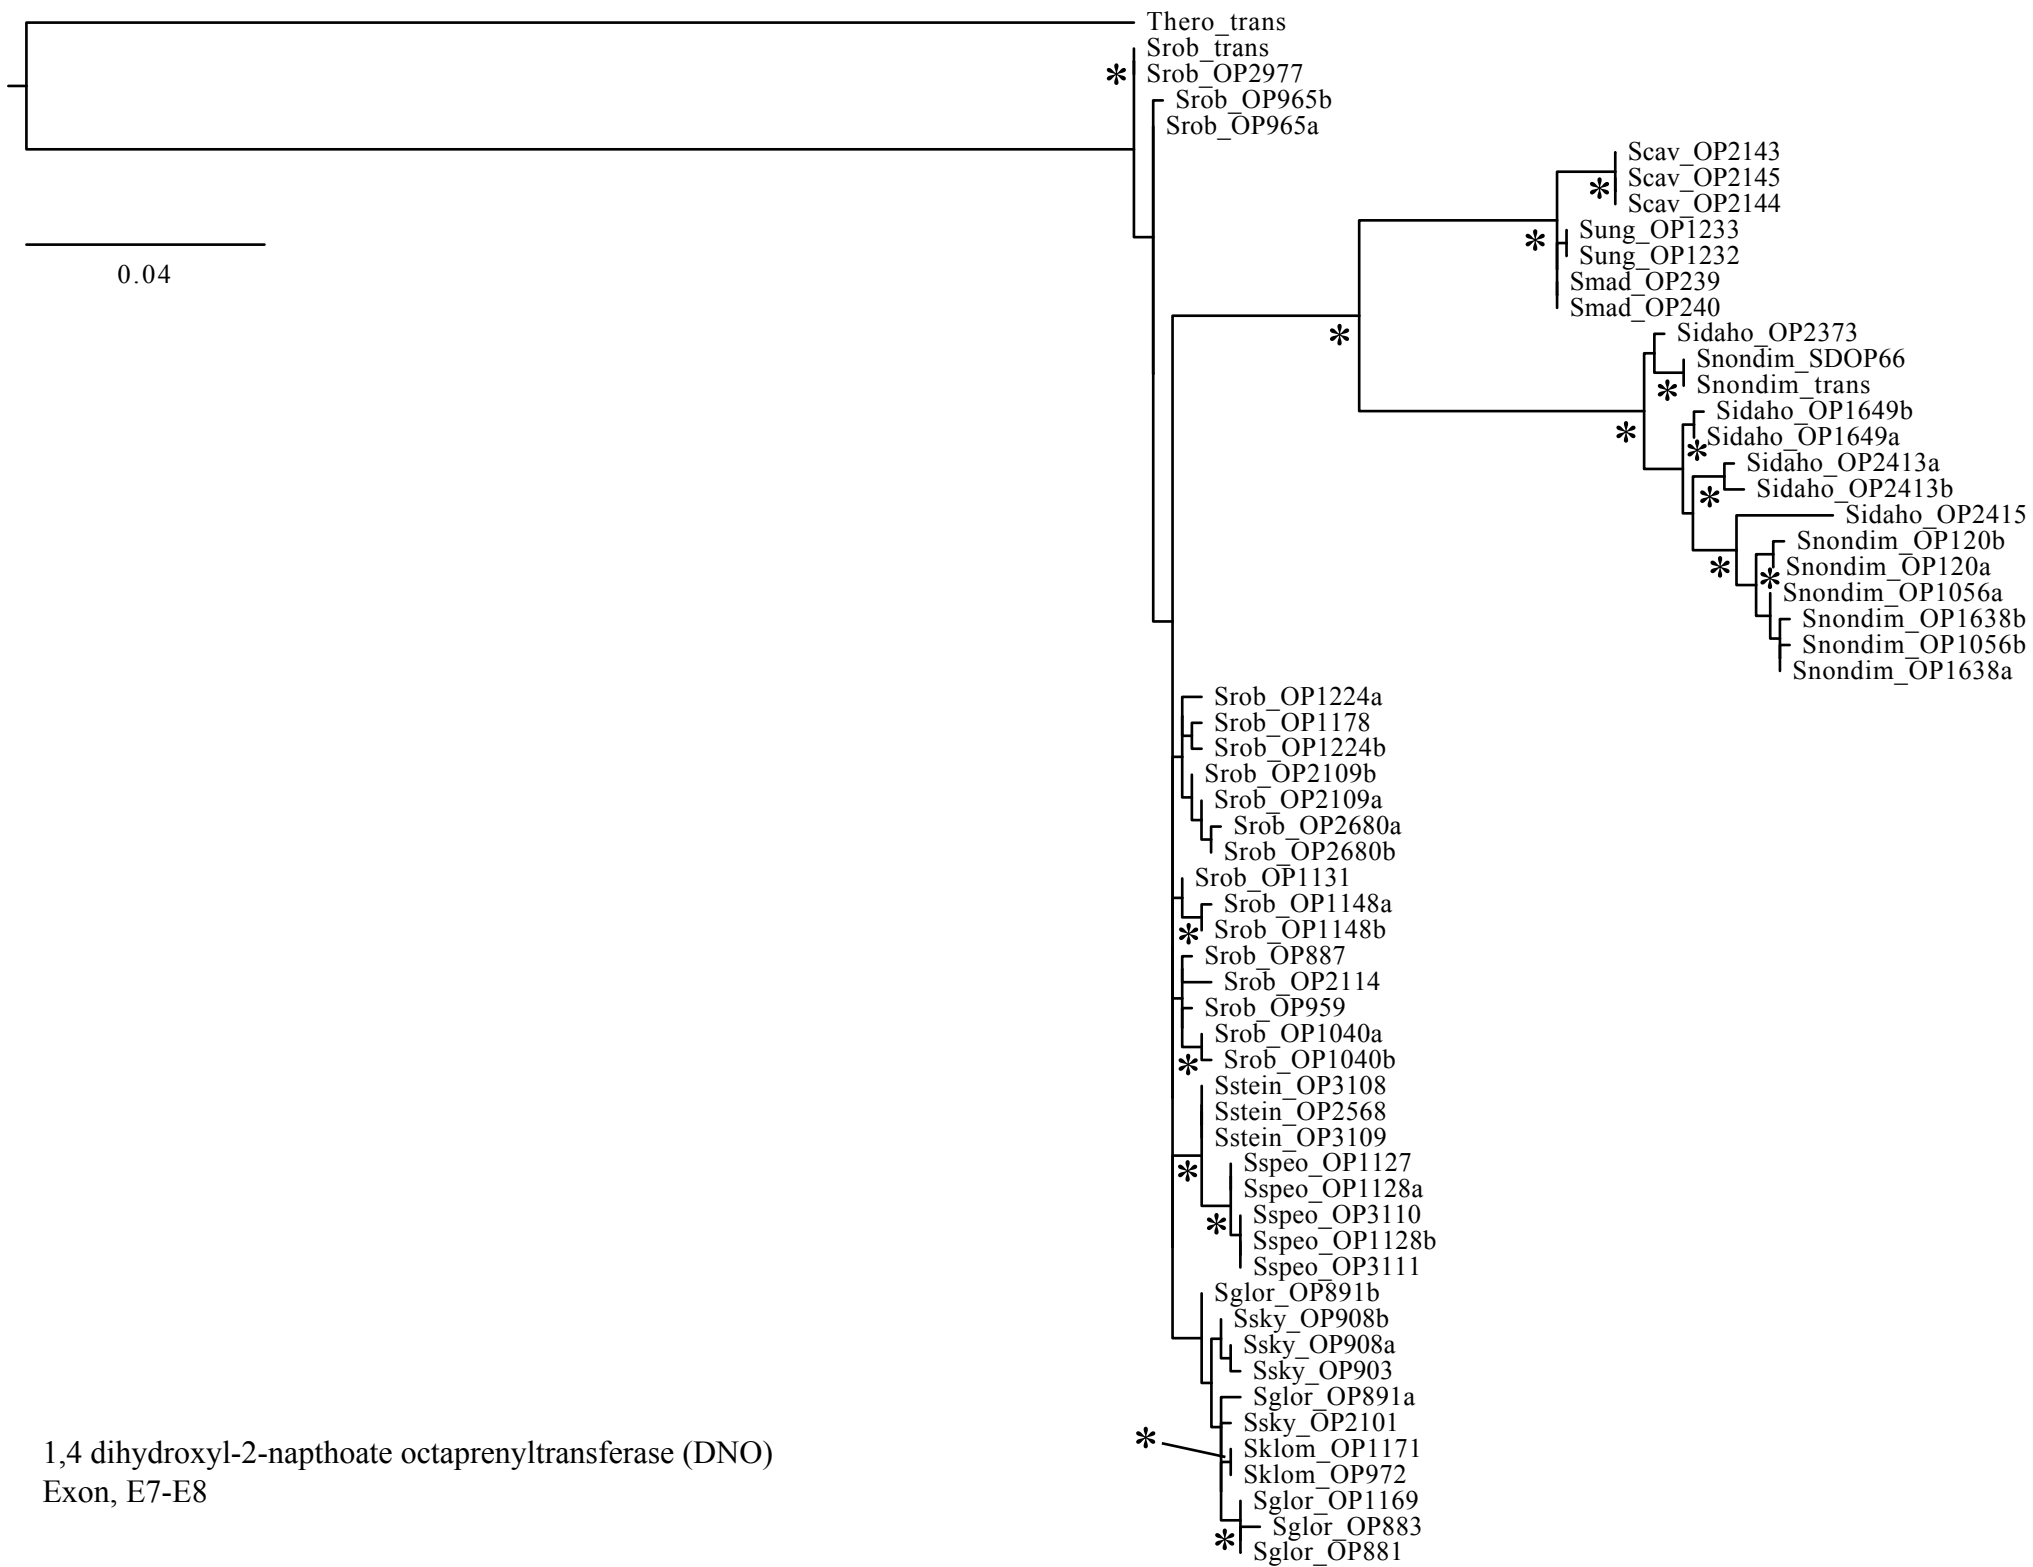

1,4 dihydroxyl-2-napthoate octaprenyltransferase (DNO)  
Exon, E7-E8

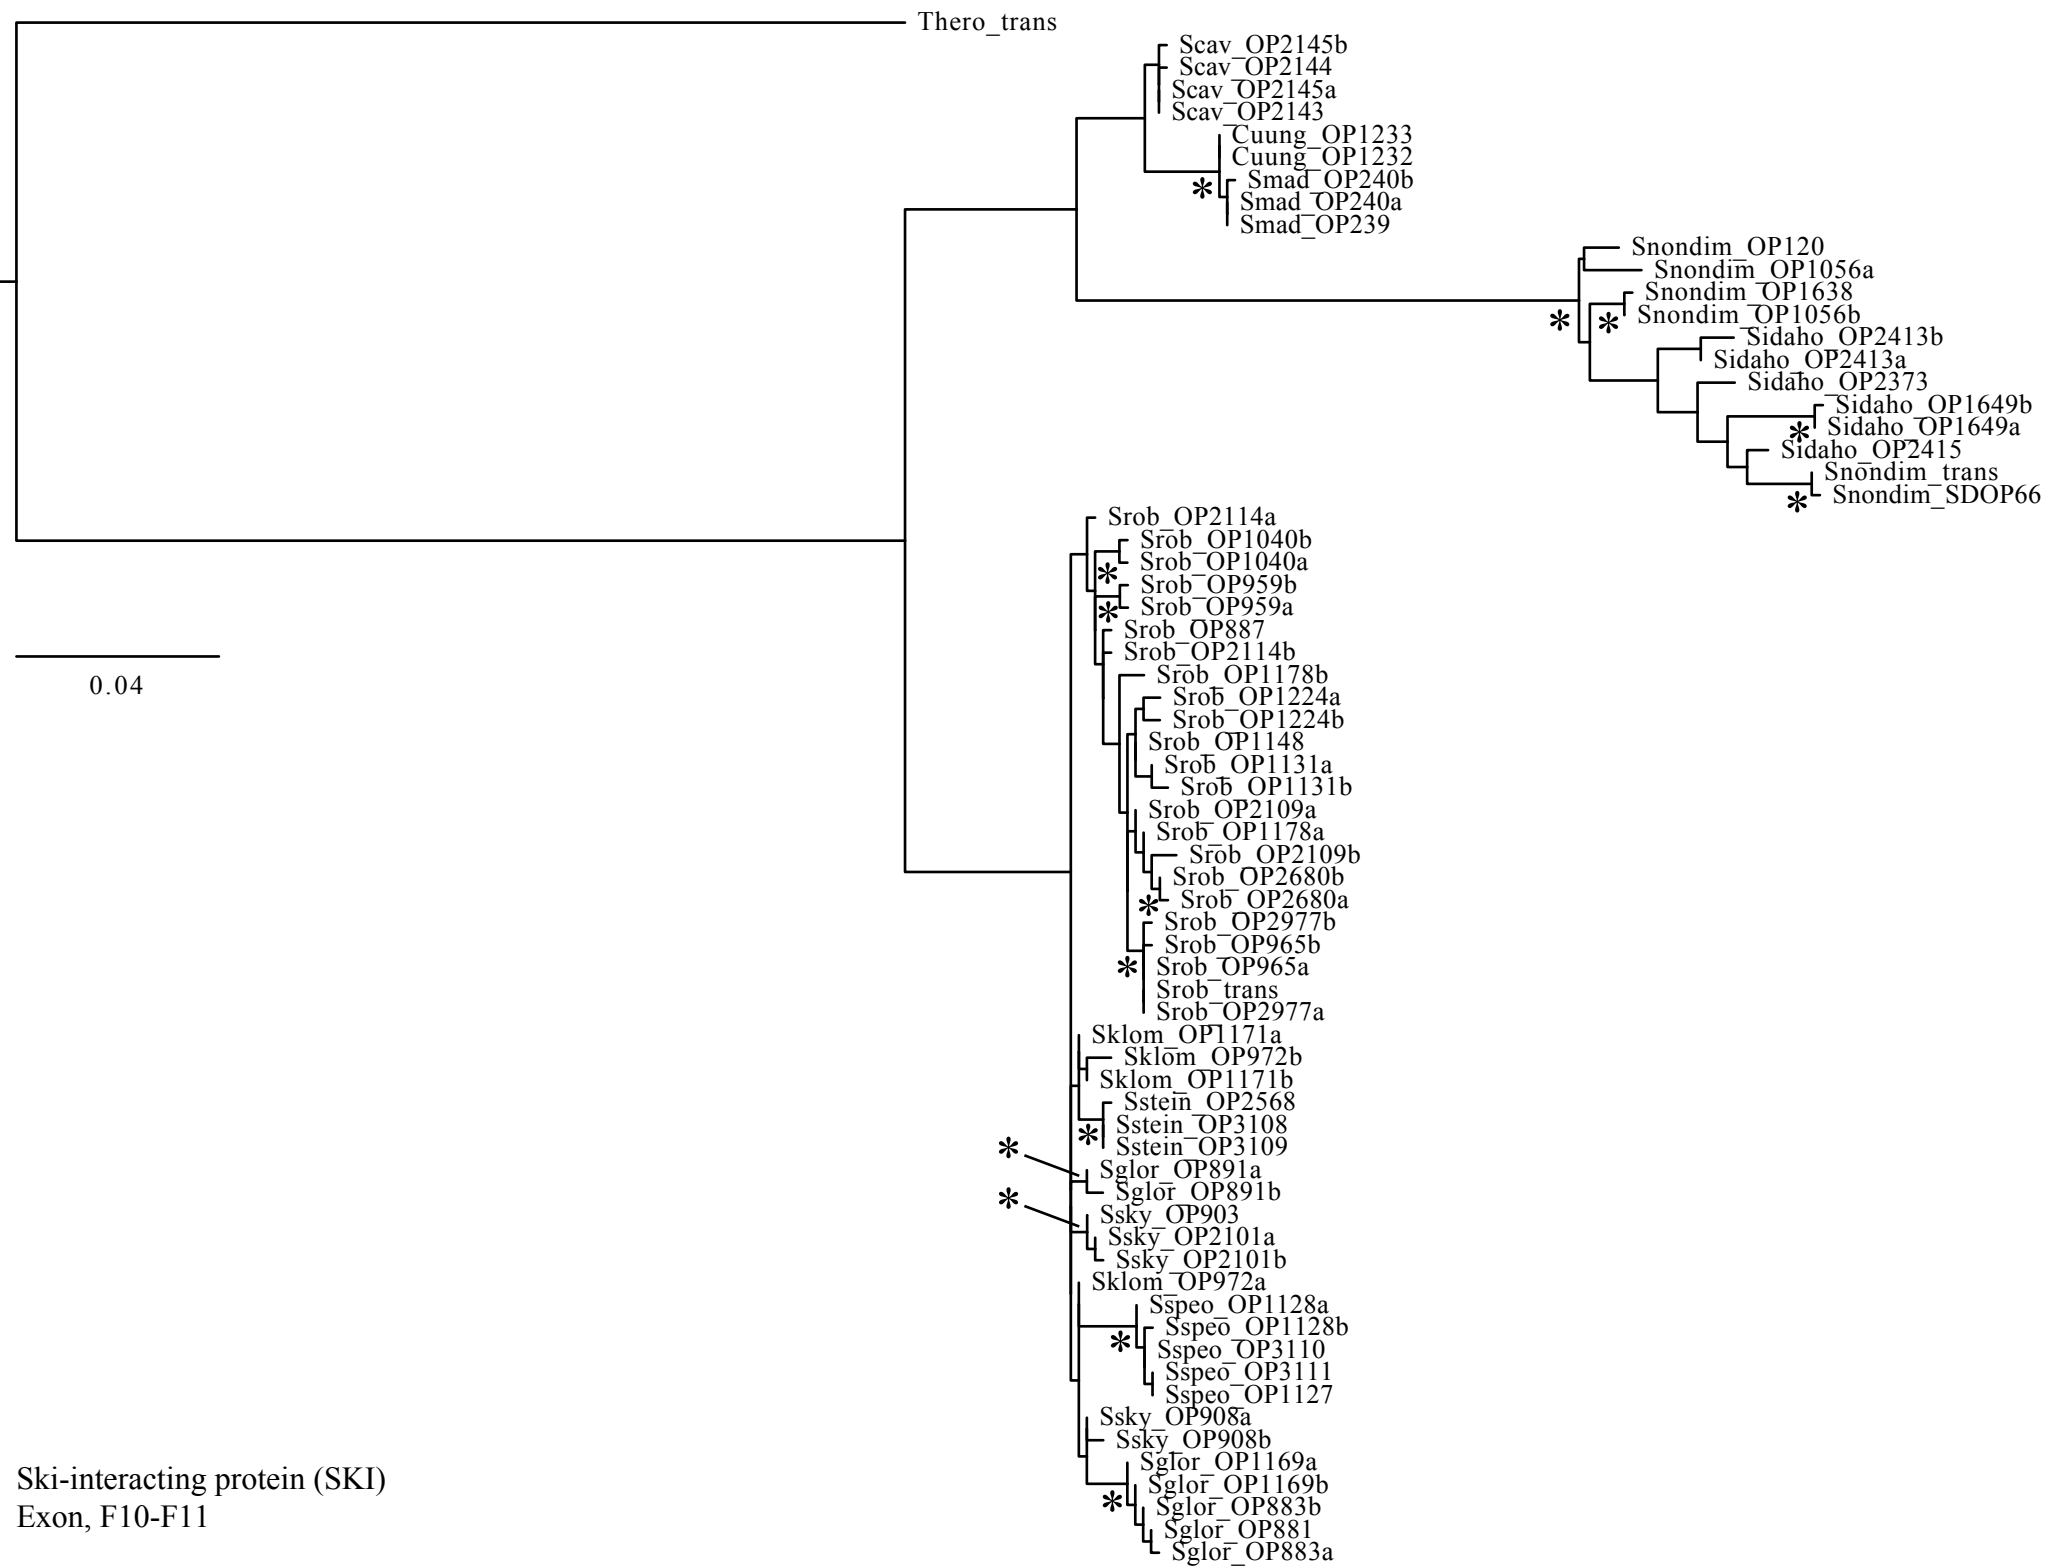

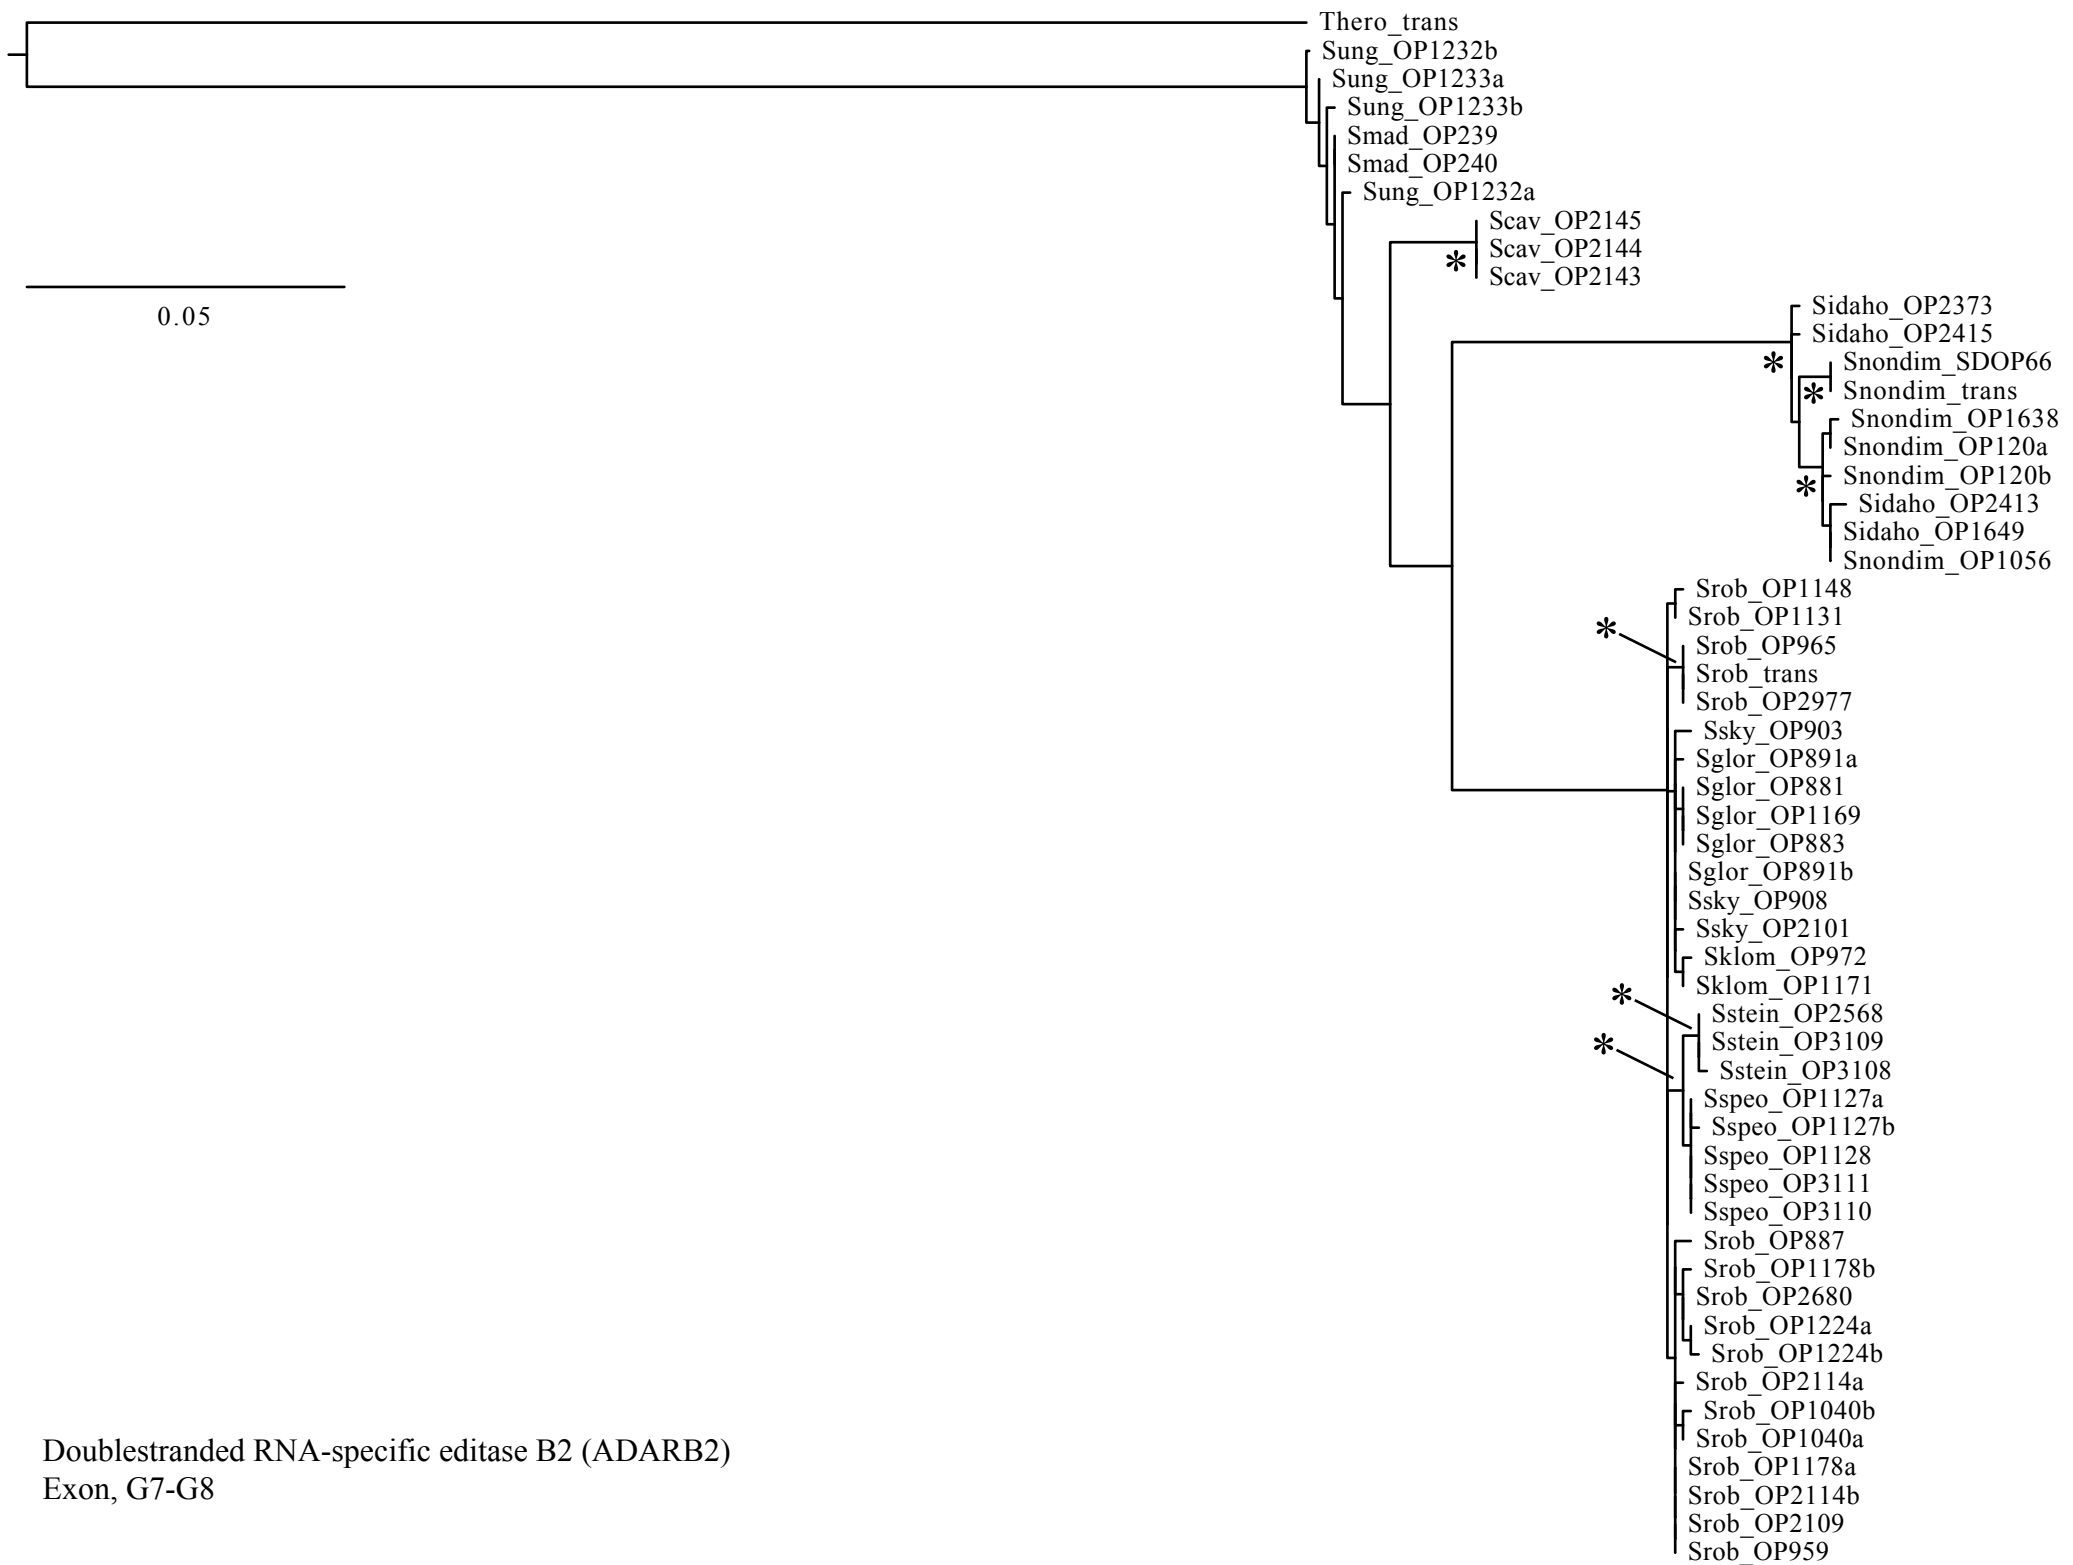

Doublestranded RNA-specific editase B2 (ADARB2)  
Exon, G7-G8

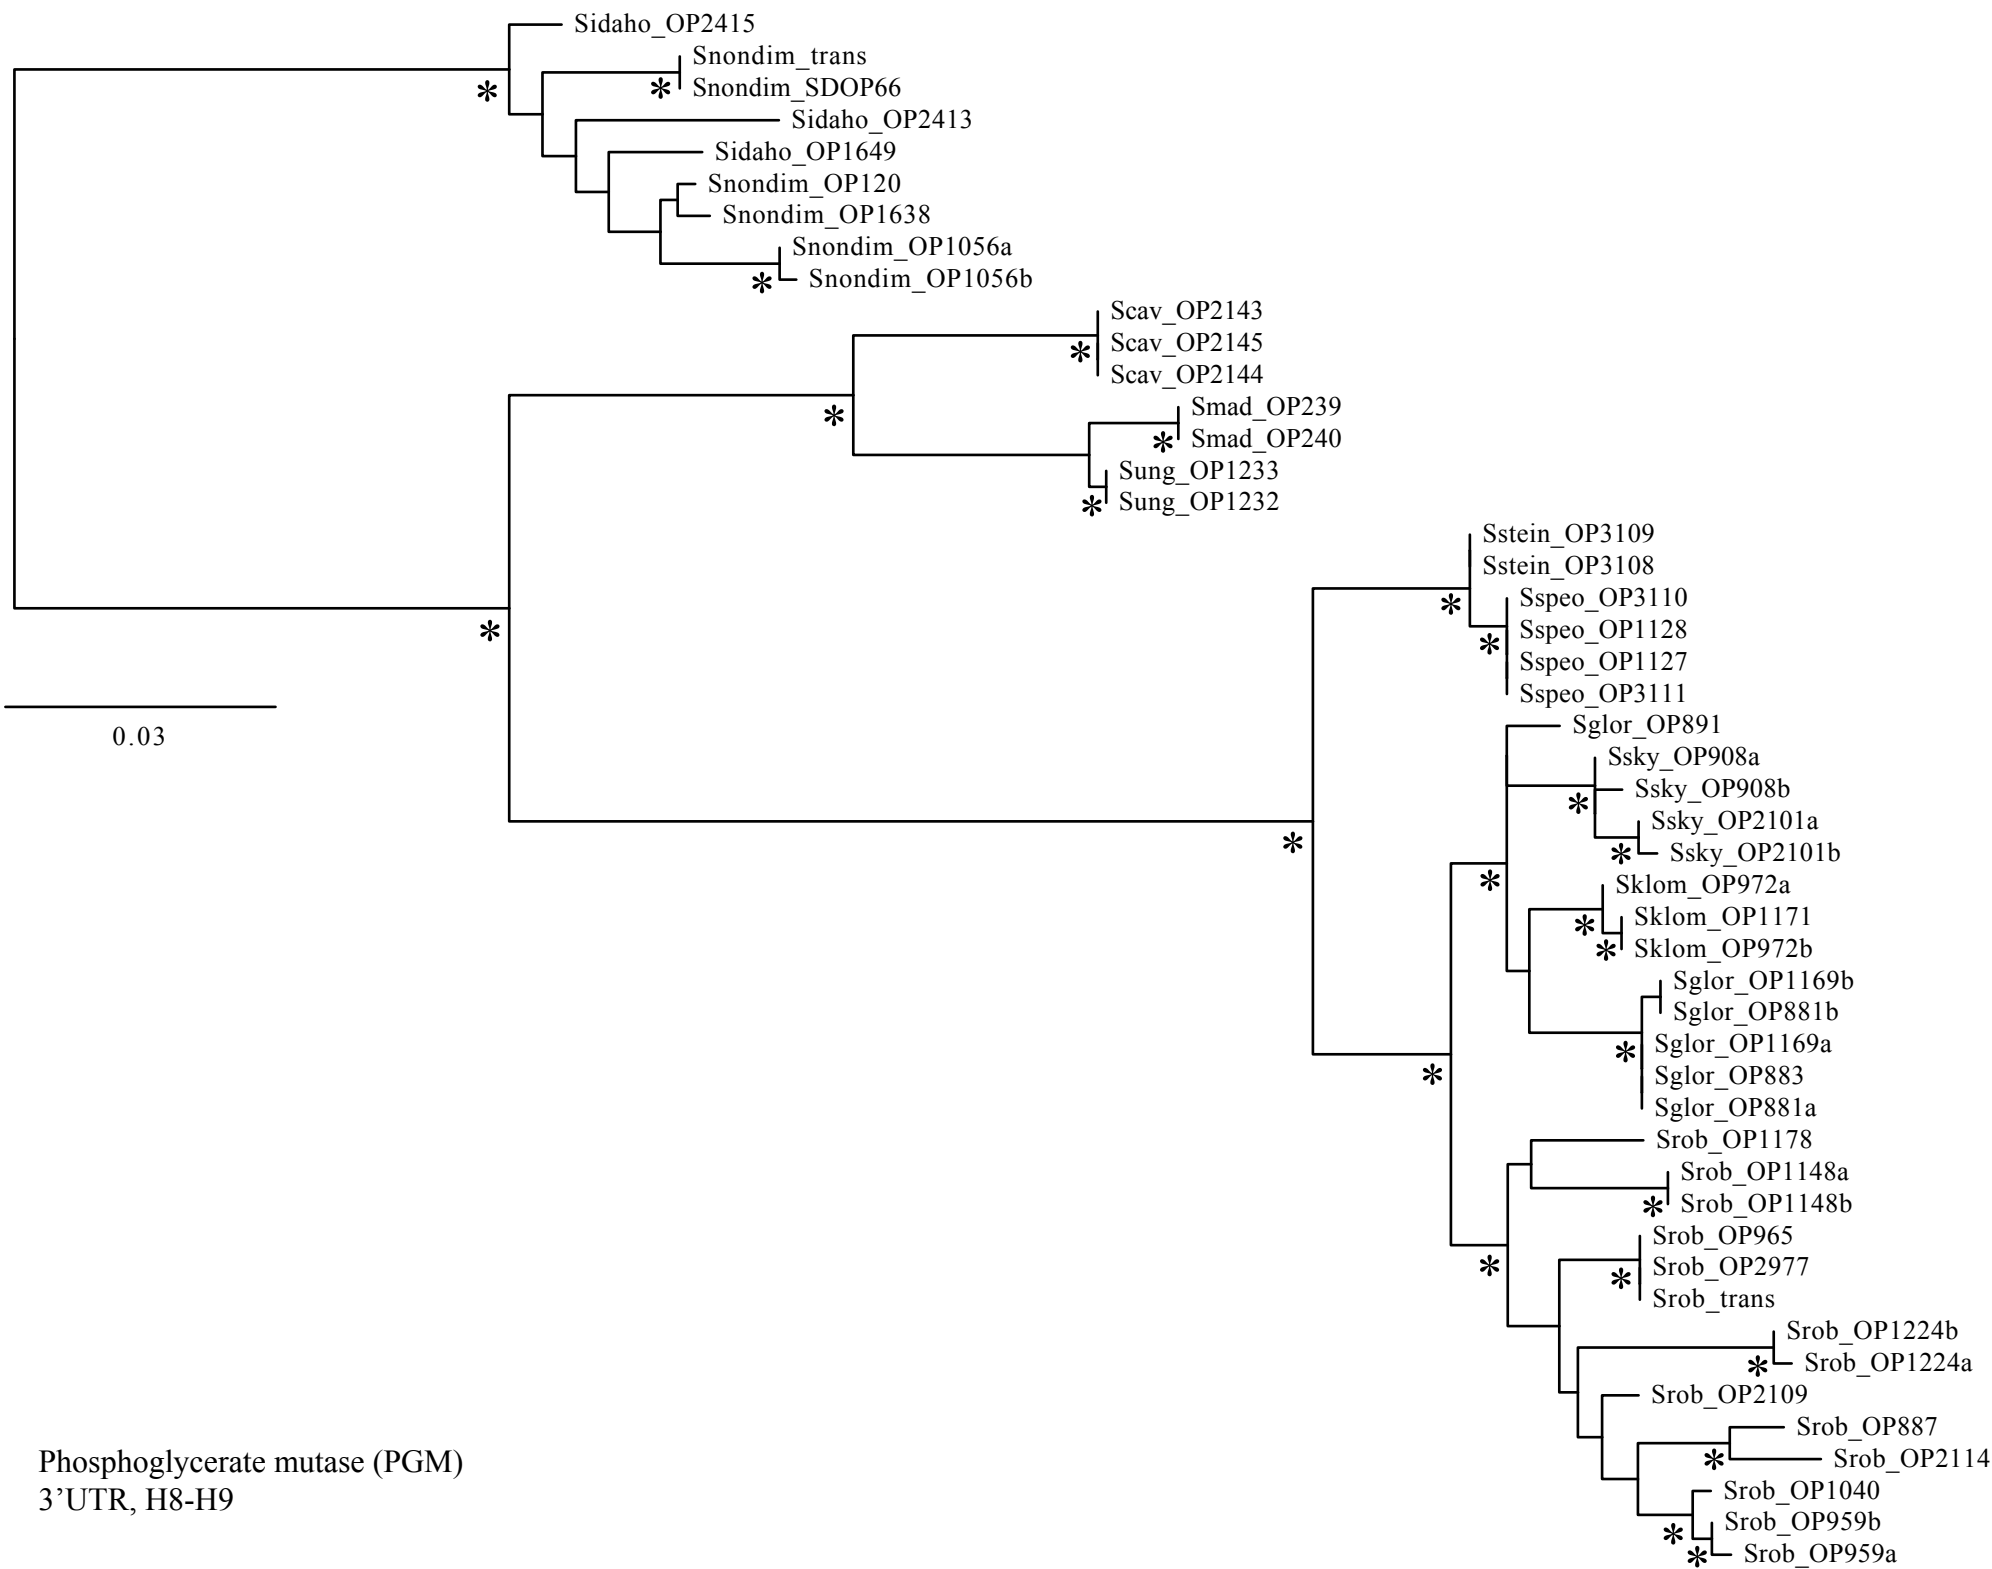

Phosphoglycerate mutase (PGM)  
3'UTR, H8-H9
