# Supplementary material for: Integrative Taxonomy and Species Delimitation in Harvestmen: A Revision of the Western North American Genus Sclerobunus (Opiliones: Laniatores: Travunioidea)
Source: PubMed Central journal article supplement (PMC4140732; doi:10.1371/journal.pone.0104982), 2014-08-21
Supplement: pone.0104982.s010.pdf [file pone.0104982.s010.pdf]

# Comparative male habitus morphology

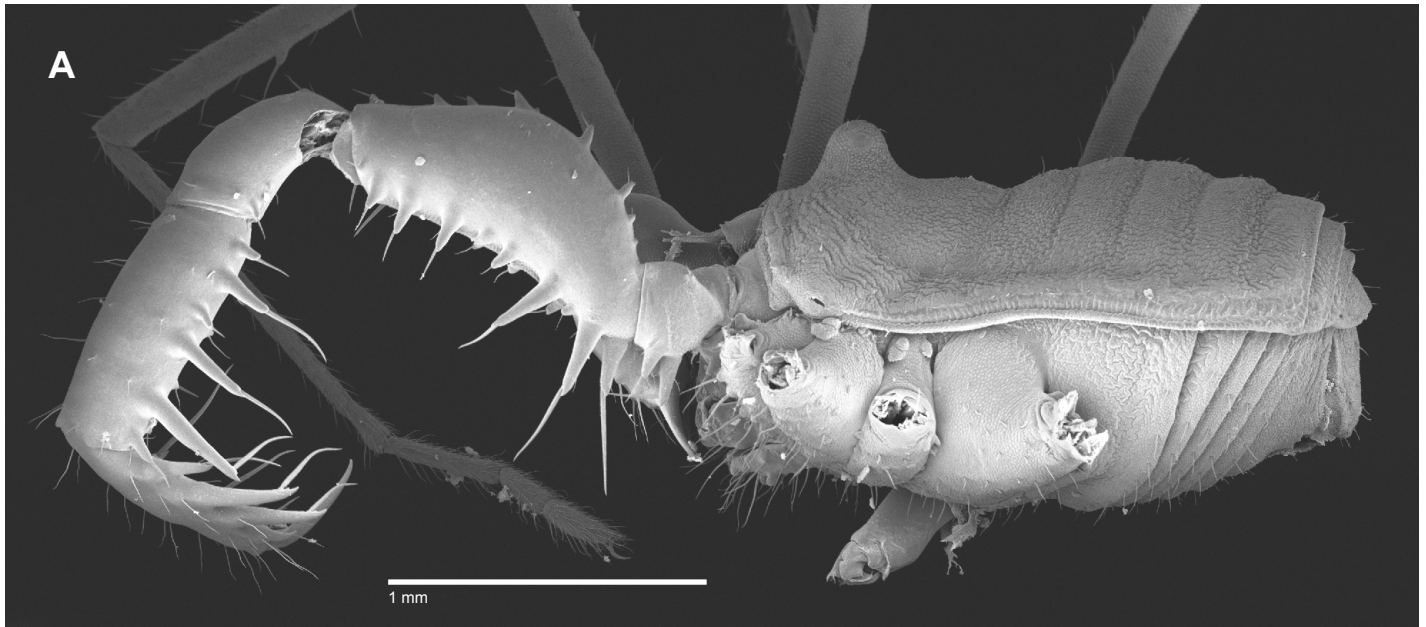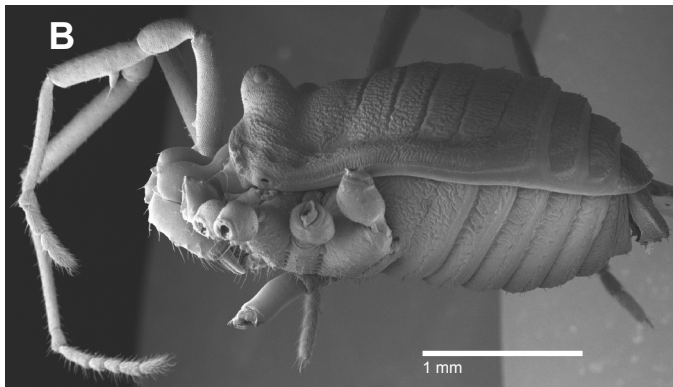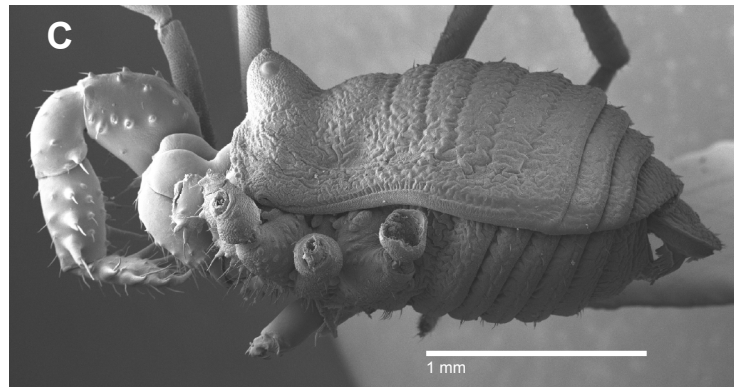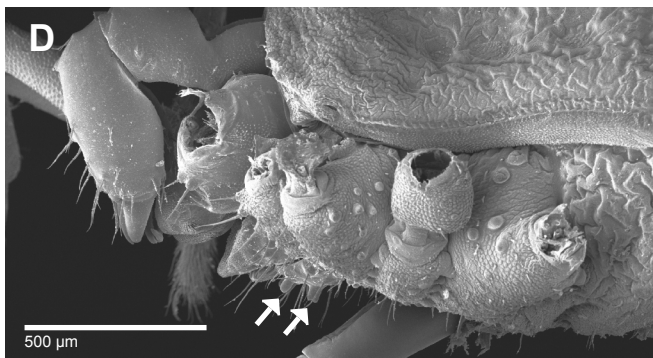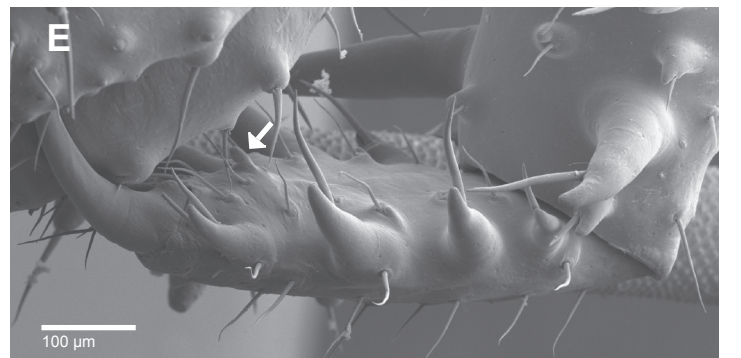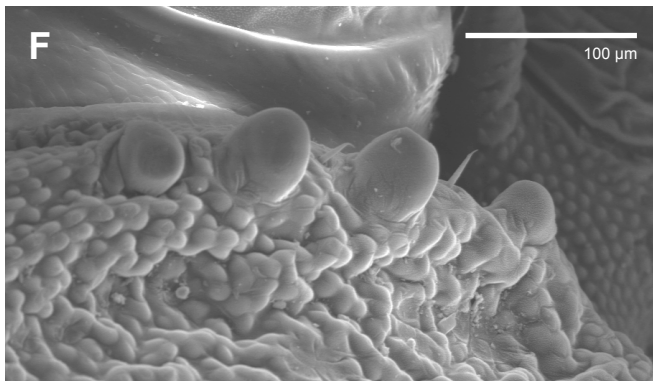

- A** *S. speoventus* (Cave of the Winds)
- B** *S. robustus* (Haviland Lake)
- C** *S. skywalker* (Manzano Mtns.)
- D** *S. glorietus* (Taos Ski Valley),  
CII lobe apophyses, 2 pairs
- E** *S. robustus* (North of Chama),  
right palpal tarsus apophysis, retrolateral
- F** *S. robustus* (Deer Creek Trail),  
right shoulder tubercles, dorsal
