# Supplementary material for: Integrative Taxonomy and Species Delimitation in Harvestmen: A Revision of the Western North American Genus Sclerobunus (Opiliones: Laniatores: Travunioidea)
Source: PubMed Central journal article supplement (PMC4140732; doi:10.1371/journal.pone.0104982), 2014-08-21
Supplement: pone.0104982.s011.pdf [file pone.0104982.s011.pdf]

## Comparative pedipalpal morphology

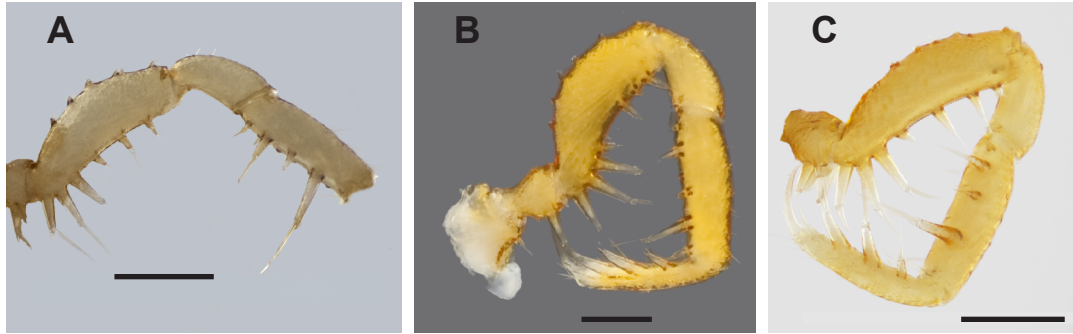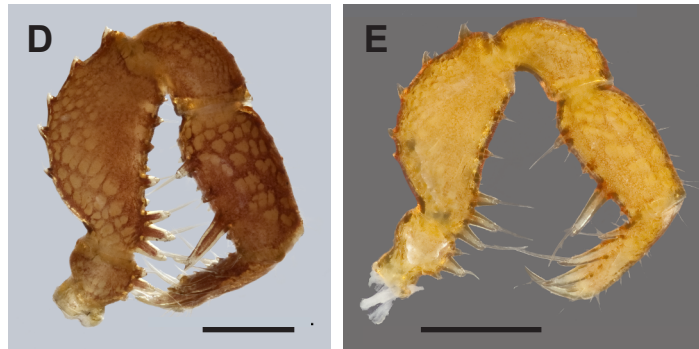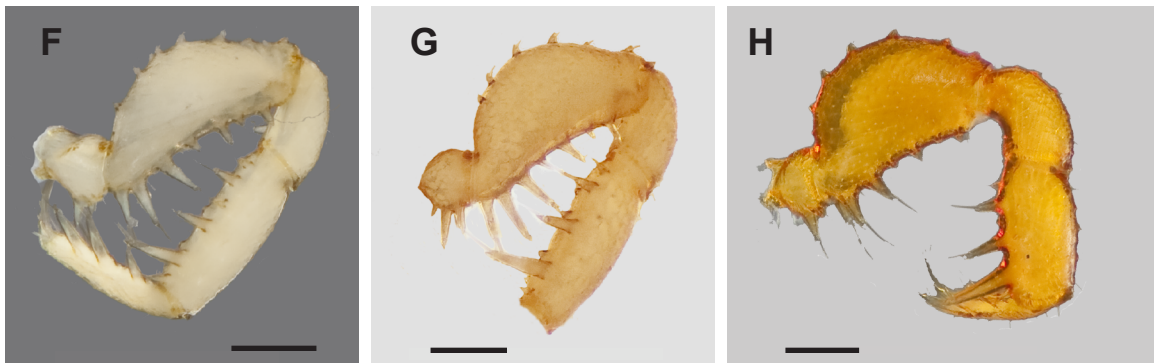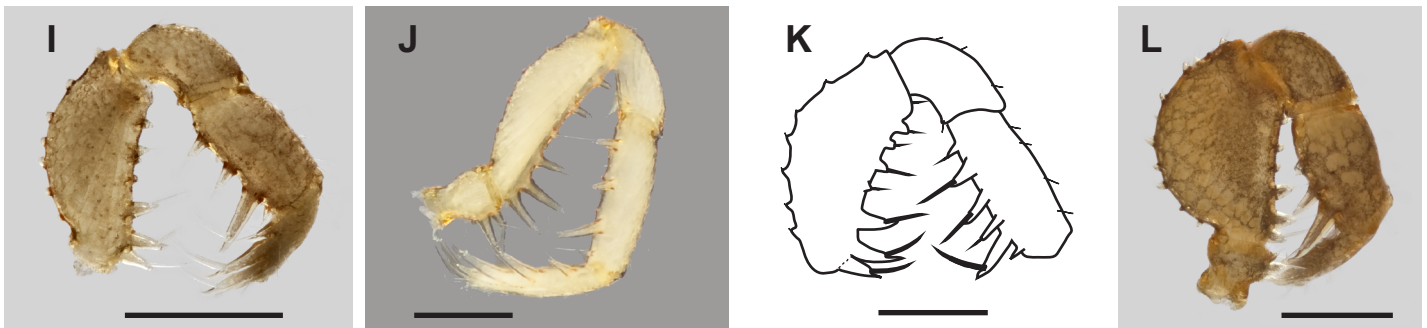

- A** *S. cavicolens* (Lewis and Clark Caverns)
- B** *S. ungulatus* (Model Cave)
- C** *S. madhousesensis* (North Madhouse Cave)
- D** *S. nondimorphicus* (Iron Creek)
- E** *S. idahoensis* (Hobo Cedar Grove)

- F** *S. speoventus* (Cave of the Winds)
- G** *S. steinmanni*, holotype (Mallory Cave)
- H** *S. robustus* (Apex Valley)
- I** *S. glorietus* (Glorieta Canyon)
- J** *S. klomax*, paratype female (Taos Ski Valley)
- K** *S. jemez*, holotype (Terrero Cave)
- L** *S. skywalkeri*, paratype (Manzano Mtns.)

Images reflected horizontally: A,D,K  
Scale bars = 0.5 mm
