# Supplementary material for: Integrative Taxonomy and Species Delimitation in Harvestmen: A Revision of the Western North American Genus Sclerobunus (Opiliones: Laniatores: Travunioidea)
Source: PubMed Central journal article supplement (PMC4140732; doi:10.1371/journal.pone.0104982), 2014-08-21
Supplement: pone.0104982.s012.pdf [file pone.0104982.s012.pdf]

# Comparative leg I morphology

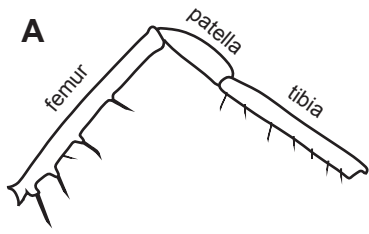

**A**  
*caviacolens*  
(Lewis and Clark Caverns) morph\_3

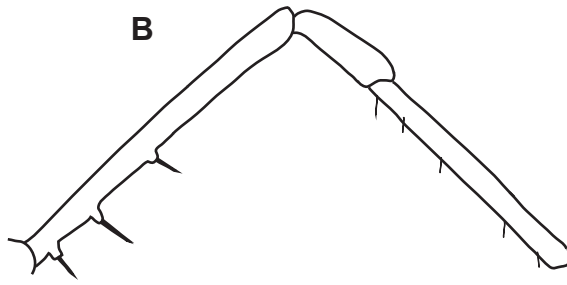

**B**  
*ungulatus*  
(Model Cave) morph\_10

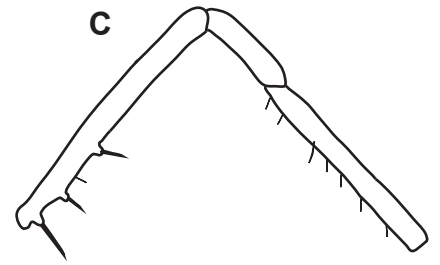

**C**  
*madhousesensis*  
(North Madhouse Cave) morph\_18, OP240

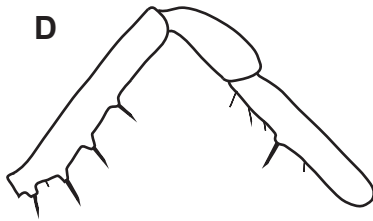

**D**  
*nondimorphicus*  
(Iron Creek) morph\_74

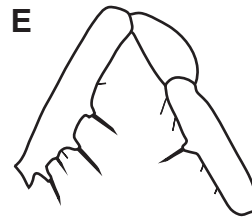

**E**  
*idahoensis*  
(Hobo Cedar Grove) morph\_59

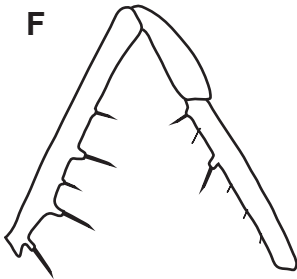

**F**  
*speoventus*  
(Cave of the Winds), morph\_6

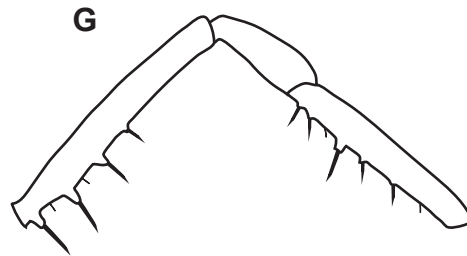

**G**  
*steinmanni*  
female paratype  
(Mallory Cave), morph\_12F

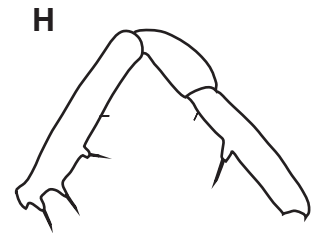

**H**  
*robustus*  
(Apex Valley Road), morph\_32

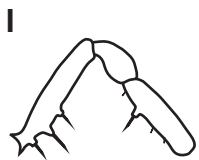

**I**  
*glorietus*  
(Glorieta Canyon), morph\_45

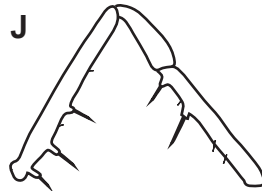

**J**  
*klomax*  
female paratype  
(Taos Ski Valley), morph\_8F

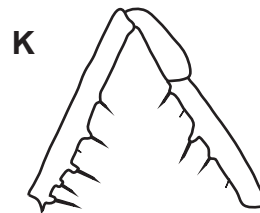

**K**  
*jemez*  
male paratype  
(Terrero Cave), morph\_54

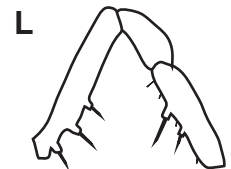

**L**  
*skywalkeri*  
male paratype  
(Manzano Mtns.), morph\_48

All drawings to same scale

1 mm
