# Supplementary material for: Integrative Taxonomy and Species Delimitation in Harvestmen: A Revision of the Western North American Genus Sclerobunus (Opiliones: Laniatores: Travunioidea)
Source: PLoS One. 2014 Aug 21;9(8):e104982. doi: 10.1371/journal.pone.0104982 (PMC4140732; doi:10.1371/journal.pone.0104982)
Supplement: Table S3 — GenBank accession numbers (Sheet 1) and genetic sampling for this study (Sheet 2). Voucher specimens in bold are those included in the 4-taxon panel (see methods). (XLSX) [file pone.0104982.s003.xlsx]

## Sheet: Genetic Sample
Voucher	Species	TPR (A1-A2)	CHP1 (A5-A6)	CHP2 (B5-B6)	neu (D7-D8)	DNO (E7-E8)	SKI (F10-F11)	ADARB2 (G7-G8)	PGM (H8-H9)
		Exon	Exon	Exon	UTR	Exon	Exon	Exon	UTR
SDOP66	S. nondimorphicus	X	X	X	s_het	X	X	X	X
OP1056	S. nondimorphicus	s_het	s_het	s_het	X	d_het	m_het	X	d_het
OP1638	S. nondimorphicus	X	X	failed	X	s_het	X	X	X
OP120	S. nondimorphicus	X	X	X	d_het	s_het	X	d_het	X
OP1649	S. idahoensis	m_het	X	X	X	s_het	s_het	X	X
OP2373	S. idahoensis	m_het	m_het	X	X	X	X	X	failed
OP2413	S. idahoensis	m_het	X	m_het	failed	m_het	m_het	X	X
OP2415	S. idahoensis	m_het	d_het	X	X	X	X	X	X
OP2143	S. cavicolens	X	X	X	X	X	X	X	X
OP2144	S. cavicolens	d_het	X	X	X	X	X	X	X		X	Sequenced, homozygous
OP2145	S. cavicolens	X	X	X	s_het	X	s_het	X	X
OP1232	S. ungulatus	X	X	s_het	X	X	X	m_het	X		s_het	single heterozygous site
OP1233	S. ungulatus	failed	X	X	X	X	X	d_het	X		d_het	two heterozygous sites
OP239	S. madhousensis	X	X	X	X	X	X	X	X		m_het	3+ heterozygous sites
OP240	S. madhousensis	X	X	X	X	X	s_het	X	X
OP2568	S. steinmanni	s_het	X	X	X	X	X	X	failed			PCR failed
OP3108	S. steinmanni	failed	X	X	X	X	X	X	X			Haplotypes phased succesfully
OP3109	S. steinmanni	X	X	failed	X	X	X	X	X			Haplotypes could not be phased
OP1127	S. speoventus	X	X	X	X	X	X	X	X
OP1128	S. speoventus	s_het	X	X	m_het	s_het	d_het	X	X
OP3110	S. speoventus	s_het	X	X	X	X	X	X	X
OP3111	S. speoventus	s_het	X	X	X	X	X	X	X
OP908	S. skywalkeri	d_het	X	d_het	s_het	s_het	d_het	X	s_het
OP2101	S. skywalkeri	X	X	s_het	X	X	s_het	X	s_het
OP903	S. skywalkeri	s_het	X	X	m_het	X	X	X	failed
OP891	S. glorietus	m_het	X	X	X	m_het	X	s_het	X
OP881	S. glorietus	m_het	X	X	X	X	X	X	s_het
OP883	S. glorietus	m_het	X	m_het	X	X	d_het	X	X
OP1169	S. glorietus	m_het	X	failed	X	X	s_het	X	d_het
OP972	S. klomax	X	s_het	X	X	X	m_het	X	s_het
OP1171	S. klomax	X	X	X	X	X	s_het	X	X
OP1224	S. robustus	X	m_het	X	m_het	m_het	m_het	X	m_het
OP1178	S. robustus	m_het	failed	X	s_het	X	m_het	d_het	m_het
OP1131	S. robustus	X	X	X	X	X	d_het	x	failed
OP1148	S. robustus	s_het	X	X	X	s_het	X	X	X
OP965	S. robustus	s_het	d_het	X	m_het	s_het	s_het	X	X
OP2977	S. robustus	X	X	m_het	m_het	X	s_het	X	X
OP887	S. robustus	X	X	X	s_het	X	X	X	X
OP2114	S. robustus	m_het	s_het	X	failed	X	m_het	s_het	X
OP959	S. robustus	s_het	failed	X	m_het	X	d_het	X	s_het
OP1040	S. robustus	d_het	X	d_het	d_het	s_het	d_het	s_het	m_het
OP2109	S. robustus	m_het	m_het	X	X	s_het	m_het	X	X
OP2680	S. robustus	X	X	X	s_het	s_het	s_het	X	failed

## Sheet: GenBank
Voucher	Species	TPR (A1-A2)	CHP1 (A5-A6)	CHP2 (B5-B6)	neu (D7-D8)	DNO (E7-E8)	SKI (F10-F11)	ADARB2 (G7-G8)	PGM (H8-H9)
		Exon	Exon	Exon	UTR	Exon	Exon	Exon	UTR
SDOP66	S. nondimorphicus	KJ585327	KJ585081	KJ585122	KJ585205	KJ585162	KJ585284	KJ585038	KJ585246
OP1056	S. nondimorphicus	KJ585328	KJ585082	KJ585123	KJ585206	KJ585163	KJ585285	KJ585039	KJ585247
OP1638	S. nondimorphicus	KJ585329	KJ585083		KJ585207	KJ585164	KJ585286	KJ585040	KJ585248
OP120	S. nondimorphicus	KJ585330	KJ585084	KJ585124	KJ585208	KJ585165	KJ585287	KJ585041	KJ585249
OP1649	S. idahoensis	KJ585331	KJ585085	KJ585125	KJ585209	KJ585166	KJ585288	KJ585042	KJ585250
OP2373	S. idahoensis	KJ585332	KJ585086	KJ585126	KJ585210	KJ585167	KJ585289	KJ585043
OP2413	S. idahoensis	KJ585333	KJ585087	KJ585127		KJ585168	KJ585290	KJ585044	KJ585251
OP2415	S. idahoensis	KJ585334	KJ585088	KJ585128	KJ585211	KJ585169	KJ585291	KJ585045	KJ585252
OP2143	S. cavicolens	KJ585335	KJ585089	KJ585129	KJ585212	KJ585170	KJ585292	KJ585046	KJ585253
OP2144	S. cavicolens	KJ585336	KJ585090	KJ585130	KJ585213	KJ585171	KJ585293	KJ585047	KJ585254
OP2145	S. cavicolens	KJ585337	KJ585091	KJ585131	KJ585214	KJ585172	KJ585294	KJ585048	KJ585255
OP1232	S. ungulatus	KJ585338	KJ585092	KJ585132	KJ585215	KJ585173	KJ585295	KJ585049	KJ585256
OP1233	S. ungulatus		KJ585093	KJ585133	KJ585216	KJ585174	KJ585296	KJ585050	KJ585257
OP239	S. madhousensis	KJ585339	KJ585094	KJ585134	KJ585217	KJ585175	KJ585297	KJ585051	KJ585258
OP240	S. madhousensis	KJ585340	KJ585095	KJ585135	KJ585218	KJ585176	KJ585298	KJ585052	KJ585259
OP2568	S. steinmanni	KJ585341	KJ585096	KJ585136	KJ585219	KJ585177	KJ585299	KJ585053
OP3108	S. steinmanni		KJ585097	KJ585137	KJ585220	KJ585178	KJ585300	KJ585054	KJ585260
OP3109	S. steinmanni	KJ585342	KJ585098		KJ585221	KJ585179	KJ585301	KJ585055	KJ585261
OP1127	S. speoventus	KJ585343	KJ585099	KJ585138	KJ585222	KJ585180	KJ585302	KJ585056	KJ585262
OP1128	S. speoventus	KJ585344	KJ585100	KJ585139	KJ585223	KJ585181	KJ585303	KJ585057	KJ585263
OP3110	S. speoventus	KJ585345	KJ585101	KJ585140	KJ585224	KJ585182	KJ585304	KJ585058	KJ585264
OP3111	S. speoventus	KJ585346	KJ585102	KJ585141	KJ585225	KJ585183	KJ585305	KJ585059	KJ585265
OP908	S. skywalkeri	KJ585348	KJ585104	KJ585143	KJ585227	KJ585185	KJ585307	KJ585061	KJ585267
OP2101	S. skywalkeri	KJ585349	KJ585105	KJ585144	KJ585228	KJ585186	KJ585308	KJ585062	KJ585268
OP903	S. skywalkeri	KJ585350	KJ585106	KJ585145	KJ585229	KJ585187	KJ585309	KJ585063
OP891	S. glorietus	KJ585347	KJ585103	KJ585142	KJ585226	KJ585184	KJ585306	KJ585060	KJ585266
OP881	S. glorietus	KJ585351	KJ585107	KJ585146	KJ585230	KJ585188	KJ585310	KJ585064	KJ585269
OP883	S. glorietus	KJ585352	KJ585108	KJ585147	KJ585231	KJ585189	KJ585311	KJ585065	KJ585270
OP1169	S. glorietus	KJ585353	KJ585109		KJ585232	KJ585190	KJ585312	KJ585066	KJ585271
OP972	S. klomax	KJ585354	KJ585110	KJ585148	KJ585233	KJ585191	KJ585313	KJ585067	KJ585272
OP1171	S. klomax	KJ585355	KJ585111	KJ585149	KJ585234	KJ585192	KJ585314	KJ585068	KJ585273
OP1224	S. robustus	KJ585356	KJ585112	KJ585150	KJ585235	KJ585193	KJ585315	KJ585069	KJ585274
OP1178	S. robustus	KJ585357		KJ585151	KJ585236	KJ585194	KJ585316	KJ585070	KJ585275
OP1131	S. robustus	KJ585358	KJ585113	KJ585152	KJ585237	KJ585195	KJ585317	KJ585071
OP1148	S. robustus	KJ585359	KJ585114	KJ585153	KJ585238	KJ585196	KJ585318	KJ585072	KJ585276
OP965	S. robustus	KJ585360	KJ585115	KJ585154	KJ585239	KJ585197	KJ585319	KJ585073	KJ585277
OP2977	S. robustus	KJ585361	KJ585116	KJ585155	KJ585240	KJ585198	KJ585320	KJ585074	KJ585278
OP887	S. robustus	KJ585362	KJ585117	KJ585156	KJ585241	KJ585199	KJ585321	KJ585075	KJ585279
OP2114	S. robustus	KJ585363	KJ585118	KJ585157		KJ585200	KJ585322	KJ585076	KJ585280
OP959	S. robustus	KJ585364		KJ585158	KJ585242	KJ585201	KJ585323	KJ585077	KJ585281
OP1040	S. robustus	KJ585365	KJ585119	KJ585159	KJ585243	KJ585202	KJ585324	KJ585078	KJ585282
OP2109	S. robustus	KJ585366	KJ585120	KJ585160	KJ585244	KJ585203	KJ585325	KJ585079	KJ585283
OP2680	S. robustus	KJ585367	KJ585121	KJ585161	KJ585245	KJ585204	KJ585326	KJ585080
Transcriptome	Theromaster brunneus	KJ585385	KJ585371	KJ585374		KJ585377	KJ585382	KJ585368
Transcriptome	S. nondimorphicus	KJ585386	KJ585372	KJ585375	KJ585388	KJ585378	KJ585383	KJ585369	KJ585380
Transcriptome	S. robustus	KJ585387	KJ585373	KJ585376	KJ585389	KJ585379	KJ585384	KJ585370	KJ585381
